# Supplementary material for: Biomarker-focused multi-drug combination therapy and repurposing trial in mdx mice
Source: PubMed Central journal article supplement (PMC7899329; doi:10.1371/journal.pone.0246507), 2021-02-22
Supplement: pone.0246507.s001.pdf [file pone.0246507.s001.pdf]

Supplementary Information for Multidrug AGADA Trial

S1 File

**Supplementary Table 1. Summary of candidate efficacy and safety biomarkers for vamorolone and prednisolone.** Shown are proteins that were significant by Group 1 (vehicle) vs. Group 2 (prednisolone), and then also tested as significant in three of the four validation group comparisons (p<0.05; Group 1 vs. Groups 6, 7, 8, or 9). ns indicates “not significant”

| Protein Identifying Information | Uniprot ID | Prednisolone (Group 2) |                                 |                                     | Rituximab + Prednisolone Treatment Group (Group 6) |                                 |                                     | BAIBA low dose + Prednisolone Treatment Group (Group 7) |                                 |                                     | BAIBA high dose + Prednisolone Treatment Group (Group 8) |                                 |                                     | BAIBA low dose + Rituximab + Prednisolone Treatment Group (Group 9) |                                 |                                     |
|---------------------------------|------------|------------------------|---------------------------------|-------------------------------------|----------------------------------------------------|---------------------------------|-------------------------------------|---------------------------------------------------------|---------------------------------|-------------------------------------|----------------------------------------------------------|---------------------------------|-------------------------------------|---------------------------------------------------------------------|---------------------------------|-------------------------------------|
|                                 |            | n                      | P-value (comparison to vehicle) | Fold Change (comparison to vehicle) | n                                                  | P-value (comparison to vehicle) | Fold Change (comparison to vehicle) | n                                                       | P-value (comparison to vehicle) | Fold Change (comparison to vehicle) | n                                                        | P-value (comparison to vehicle) | Fold Change (comparison to vehicle) | n                                                                   | P-value (comparison to vehicle) | Fold Change (comparison to vehicle) |
| 14-3-3 protein zeta/delta       | P63104     | 6                      | 0.0087                          | -1.392                              | 6                                                  | 0.026                           | -1.312                              | 6                                                       | 0.0152                          | -1.667                              | 6                                                        | 0.0411                          | -1.246                              | 6                                                                   | 0.0087                          | -1.463                              |
| AGR2                            | O95994     | 6                      | 0.0081                          | 1.206                               | 6                                                  | 0.005                           | 1.272                               | 6                                                       | 0.0081                          | 1.392                               | 6                                                        | 0.02                            | 1.239                               | 6                                                                   | 0.0303                          | 1.329                               |
| ALCAM                           | Q13740     | 6                      | 0.0087                          | -1.504                              | 6                                                  | 0.0087                          | -1.275                              | 6                                                       | 0.0087                          | -1.87                               | 6                                                        | ns                              | ns                                  | 6                                                                   | 0.0411                          | -1.336                              |
| Alkaline phosphatase, bone      | P05186     | 6                      | 0.0022                          | -2.811                              | 6                                                  | 0.0022                          | -2.654                              | 6                                                       | 0.0022                          | -3.713                              | 6                                                        | 0.026                           | -2.262                              | 6                                                                   | 0.0411                          | -2.438                              |
| Apo A-I                         | P02647     | 6                      | 0.0087                          | 1.44                                | 6                                                  | 0.0152                          | 1.315                               | 6                                                       | 0.0152                          | 1.93                                | 6                                                        | ns                              | ns                                  | 6                                                                   | 0.026                           | 1.537                               |
| ARSB                            | P15848     | 6                      | 0.0087                          | 1.191                               | 6                                                  | 0.0043                          | 1.221                               | 6                                                       | 0.0152                          | 1.354                               | 6                                                        | 0.0087                          | 1.179                               | 6                                                                   | 0.026                           | 1.402                               |
| AURKB                           | Q96GD4     | 6                      | 0.0087                          | 1.221                               | 6                                                  | 0.0411                          | 1.143                               | 6                                                       | 0.0411                          | 1.417                               | 6                                                        | ns                              | ns                                  | 6                                                                   | 0.0411                          | 1.206                               |
| Aurora kinase A                 | O14965     | 6                      | 0.0087                          | 1.592                               | 6                                                  | 0.0152                          | 1.321                               | 6                                                       | 0.0152                          | 1.644                               | 6                                                        | 0.026                           | 1.432                               | 6                                                                   | ns                              | ns                                  |
| B7-H2                           | O75144     | 6                      | 0.0022                          | -1.173                              | 6                                                  | 0.0022                          | -1.185                              | 6                                                       | 0.0043                          | -1.436                              | 6                                                        | 0.026                           | -1.163                              | 6                                                                   | ns                              | ns                                  |
| BCL2-like 1 protein             | Q07817     | 6                      | 0.0043                          | 1.288                               | 6                                                  | 0.0043                          | 1.291                               | 6                                                       | 0.0043                          | 1.665                               | 6                                                        | 0.026                           | 1.185                               | 6                                                                   | 0.0087                          | 1.506                               |
| bFGF-R                          | P11362     | 6                      | 0.0022                          | -1.568                              | 6                                                  | 0.0043                          | -1.364                              | 6                                                       | 0.0043                          | -1.947                              | 6                                                        | 0.026                           | -1.274                              | 6                                                                   | 0.0022                          | -1.526                              |
| BGH3                            | Q15582     | 6                      | 0.0087                          | -1.564                              | 6                                                  | 0.026                           | -1.397                              | 6                                                       | 0.026                           | -2.064                              | 6                                                        | 0.0087                          | -1.369                              | 6                                                                   | 0.0411                          | -1.454                              |
| C34 gp41 HIV Fragment           | Q70626     | 6                      | 0.0022                          | 1.671                               | 6                                                  | 0.0022                          | 1.676                               | 6                                                       | ns                              | ns                                  | 6                                                        | 0.0022                          | 1.586                               | 6                                                                   | 0.0152                          | 1.464                               |
| Cadherin-5                      | P33151     | 6                      | 0.0022                          | -2.122                              | 6                                                  | 0.0022                          | -1.847                              | 6                                                       | 0.0022                          | -2.647                              | 6                                                        | 0.0022                          | -1.712                              | 6                                                                   | 0.0022                          | -1.907                              |

## Supplementary Information for Multidrug AGADA Trial

Supplementary Table 1 - continued

| Protein           | Uniprot          | n | G2 p-val | G2 FC  | n | G6 p-val | G6 FC  | n | G7 p-val | G7 FC  | n | G8 p-val | G8 FC  | n | G9 p-val | G9 FC  |
|-------------------|------------------|---|----------|--------|---|----------|--------|---|----------|--------|---|----------|--------|---|----------|--------|
| CATE              | P14091           | 6 | 0.0087   | -1.408 | 6 | 0.0152   | -1.225 | 6 | 0.0087   | -1.428 | 6 | ns       | ns     | 6 | 0.0411   | -1.346 |
| CATF              | Q9UBX1           | 6 | 0.0043   | -2.782 | 6 | 0.0022   | -2.653 | 6 | 0.0022   | -3.424 | 6 | 0.0087   | -2.256 | 6 | ns       | ns     |
| Cathepsin A       | P10619           | 6 | 0.0087   | 1.305  | 6 | 0.0081   | 1.191  | 6 | 0.0043   | 1.355  | 6 | ns       | ns     | 6 | 0.0022   | 1.337  |
| CD23              | P06734           | 6 | 0.0022   | 1.377  | 6 | 0.0022   | 1.351  | 6 | 0.026    | 1.736  | 6 | 0.0043   | 1.351  | 6 | 0.026    | 1.641  |
| CD30              | P28908           | 6 | 0.0022   | 1.335  | 6 | 0.0043   | 1.184  | 6 | 0.0087   | 1.57   | 6 | 0.026    | 1.133  | 6 | 0.0043   | 1.266  |
| CD30 Ligand       | P32971           | 6 | 0.0087   | 1.272  | 6 | 0.0087   | 1.279  | 6 | 0.0411   | 1.62   | 6 | 0.0087   | 1.327  | 6 | 0.026    | 1.467  |
| CD39              | P49961           | 6 | 0.0087   | 1.24   | 6 | 0.0043   | 1.288  | 6 | 0.0152   | 1.559  | 6 | 0.0022   | 1.372  | 6 | 0.0043   | 1.619  |
| CD83              | Q01151           | 6 | 0.0022   | -1.274 | 6 | ns       | ns     | 6 | 0.0152   | -1.285 | 6 | 0.0247   | -1.203 | 6 | 0.0411   | -1.135 |
| CDK2/cyclin A     | P24941<br>P20248 | 6 | 0.0022   | -1.677 | 6 | 0.0022   | -1.669 | 6 | 0.0087   | -1.633 | 6 | 0.0022   | -1.867 | 6 | 0.0022   | -1.79  |
| Chitotriosidase-1 | Q13231           | 6 | 0.0087   | 1.377  | 6 | 0.0087   | 1.295  | 6 | 0.026    | 1.588  | 6 | 0.0022   | 1.356  | 6 | 0.026    | 1.496  |
| Chymase           | P23946           | 6 | 0.0043   | 1.447  | 6 | 0.026    | 1.152  | 6 | 0.0152   | 1.709  | 6 | 0.026    | 1.195  | 6 | ns       | ns     |
| Ck-b-8-1          | P55773           | 6 | 0.0022   | 1.227  | 6 | 0.0022   | 1.217  | 6 | 0.0087   | 1.246  | 6 | 0.0087   | 2.639  | 6 | 0.0087   | 2.128  |
| CK-MB             | P12277<br>P06732 | 6 | 0.0043   | -2.402 | 6 | 0.0022   | -2.604 | 6 | 0.0087   | -2.476 | 6 | 0.0043   | -2.128 | 6 | 0.0152   | -2.361 |
| c-Myc             | P01106           | 6 | 0.0043   | 1.498  | 6 | 0.0043   | 1.127  | 6 | ns       | ns     | 6 | 0.0411   | 1.11   | 6 | 0.0087   | 1.322  |
| DLL1              | O00548           | 6 | 0.0022   | -1.789 | 6 | 0.0022   | -1.638 | 6 | 0.0043   | -2.107 | 6 | 0.0022   | -1.66  | 6 | 0.0022   | -1.66  |
| DRAK2             | O94768           | 6 | 0.0087   | 1.43   | 6 | 0.0152   | 1.362  | 6 | 0.026    | 1.764  | 6 | 0.0087   | 1.42   | 6 | 0.0411   | 1.555  |
| Dtk               | Q06418           | 6 | 0.0043   | 1.204  | 6 | 0.0043   | 1.322  | 6 | 0.0087   | 1.334  | 6 | 0.0043   | 1.349  | 6 | 0.0043   | 1.481  |
| EGF               | P01133           | 6 | 0.0087   | 1.656  | 6 | 0.0022   | 1.277  | 6 | 0.026    | 1.721  | 6 | 0.0087   | 1.307  | 6 | ns       | ns     |
| Eotaxin-2         | O00175           | 6 | 0.0022   | 1.329  | 6 | 0.0022   | 1.208  | 6 | 0.0152   | 1.304  | 6 | 0.0022   | 1.163  | 6 | 0.0022   | 1.264  |

## Supplementary Information for Multidrug AGADA Trial

Supplementary Table 1 - continued

| Protein    | Uniprot | n | G2 p-val | G2 FC  | n | G6 p-val | G6 FC  | n | G7 p-val | G7 FC  | n | G8 p-val | G8 FC  | n | G9 p-val | G9 FC  |
|------------|---------|---|----------|--------|---|----------|--------|---|----------|--------|---|----------|--------|---|----------|--------|
| EPHB2      | P29323  | 6 | 0.0022   | -1.387 | 6 | 0.0087   | -1.282 | 6 | 0.0022   | -1.554 | 6 | 0.0022   | -1.236 | 6 | 0.0087   | -1.311 |
| EphB6      | O15197  | 6 | 0.0087   | -1.46  | 6 | 0.0152   | -1.34  | 6 | 0.0087   | -1.649 | 6 | ns       | ns     | 6 | 0.0087   | -1.406 |
| FGF-17     | O60258  | 6 | 0.0049   | 1.111  | 6 | 0.005    | 1.169  | 6 | 0.0303   | 1.164  | 6 | ns       | ns     | 6 | 0.0303   | 1.269  |
| FLRT3      | Q9NZU0  | 6 | 0.0087   | -1.374 | 6 | 0.0087   | -1.299 | 6 | 0.026    | -1.566 | 6 | 0.0087   | -1.367 | 6 | 0.026    | -1.403 |
| FSTL1      | Q12841  | 6 | 0.0087   | -1.556 | 6 | ns       | ns     | 6 | 0.0152   | -2.032 | 6 | 0.0152   | -1.486 | 6 | 0.0087   | -1.776 |
| GFRa-2     | O00451  | 6 | 0.0022   | -1.578 | 6 | 0.0022   | -1.507 | 6 | 0.0087   | -1.322 | 6 | 0.0022   | -1.421 | 6 | 0.0022   | -1.518 |
| GITR       | Q9Y5U5  | 6 | 0.0022   | -1.691 | 6 | 0.0043   | -1.427 | 6 | 0.026    | -1.98  | 6 | 0.0043   | -1.521 | 6 | 0.0022   | -1.653 |
| Glypican 3 | P51654  | 6 | 0.0087   | 1.882  | 6 | 0.026    | 1.523  | 6 | 0.0152   | 2.479  | 6 | 0.0152   | 1.54   | 6 | ns       | ns     |
| HAI-1      | O43278  | 6 | 0.0043   | 1.258  | 6 | 0.0043   | 1.321  | 6 | 0.0087   | 1.381  | 6 | 0.0022   | 1.344  | 6 | 0.0087   | 1.46   |
| HSP 90b    | P08238  | 6 | 0.0087   | -1.53  | 6 | 0.0087   | -1.469 | 6 | 0.026    | -1.767 | 6 | 0.026    | -1.419 | 6 | 0.0043   | -1.659 |
| HXK1       | P19367  | 6 | 0.0087   | 1.706  | 6 | 0.0152   | 1.227  | 6 | 0.0152   | 2.254  | 6 | ns       | ns     | 6 | 0.0411   | 2.095  |
| I-309      | P22362  | 6 | 0.0043   | 1.21   | 6 | 0.0022   | 1.176  | 6 | 0.0043   | 1.536  | 6 | ns       | ns     | 6 | 0.0022   | 1.343  |
| IGFBP-5    | P24593  | 6 | 0.0087   | -1.424 | 6 | 0.0022   | -1.356 | 6 | 0.0087   | -1.873 | 6 | 0.0022   | -1.277 | 6 | 0.0022   | -1.57  |
| IL-12 RB2  | Q99665  | 6 | 0.0087   | -1.275 | 6 | 0.0411   | -1.184 | 6 | 0.0087   | -1.447 | 6 | 0.0411   | -1.213 | 6 | 0.026    | -1.308 |
| IL-18 BPa  | O95998  | 6 | 0.0022   | -2.311 | 6 | 0.0022   | -1.813 | 6 | 0.0022   | -2.585 | 6 | 0.0022   | -1.736 | 6 | 0.0022   | -1.935 |
| IL-18 Rb   | O95256  | 6 | 0.005    | 1.216  | 6 | 0.005    | 1.151  | 6 | 0.0303   | 1.264  | 6 | 0.005    | 1.171  | 6 | 0.005    | 1.243  |
| IL-5 Ra    | Q01344  | 6 | 0.0087   | 1.225  | 6 | 0.0087   | 1.2    | 6 | 0.0087   | 1.408  | 6 | 0.0152   | 1.168  | 6 | 0.0152   | 1.295  |
| IL-8       | P10145  | 6 | 0.0043   | 1.185  | 6 | 0.0087   | 1.17   | 6 | 0.026    | 1.298  | 6 | 0.0087   | 1.18   | 6 | 0.026    | 1.281  |
| JAG1       | P78504  | 6 | 0.0087   | -1.342 | 6 | 0.0087   | -1.293 | 6 | 0.0022   | -1.75  | 6 | ns       | ns     | 6 | 0.0152   | -1.386 |
| LAG-1      | Q8NHW4  | 6 | 0.0022   | 1.253  | 6 | 0.0022   | 1.274  | 6 | 0.0411   | 1.249  | 6 | ns       | ns     | 6 | 0.0087   | 1.333  |

## Supplementary Information for Multidrug AGADA Trial

Supplementary Table 1 - continued

| Protein                      | Uniprot | n | G2 p-val | G2 FC  | n | G6 p-val | G6 FC  | n | G7 p-val | G7 FC  | n | G8 p-val | G8 FC  | n | G9 p-val | G9 FC  |
|------------------------------|---------|---|----------|--------|---|----------|--------|---|----------|--------|---|----------|--------|---|----------|--------|
| LEG9                         | O00182  | 6 | 0.0087   | 1.464  | 6 | 0.0087   | 1.248  | 6 | 0.026    | 1.646  | 6 | 0.026    | 1.211  | 6 | ns       | ns     |
| LGMN                         | Q99538  | 6 | 0.0022   | -1.301 | 6 | 0.0022   | -1.316 | 6 | 0.0022   | -1.472 | 6 | 0.0022   | -1.311 | 6 | 0.0022   | -1.448 |
| LSAMP                        | Q13449  | 6 | 0.0022   | -1.767 | 6 | 0.0043   | -1.54  | 6 | 0.0022   | -2.288 | 6 | 0.0043   | -1.422 | 6 | 0.0087   | -1.584 |
| MATN2                        | O00339  | 6 | 0.0043   | -1.712 | 6 | 0.0152   | -1.491 | 6 | 0.0022   | -2.348 | 6 | 0.0022   | -1.776 | 6 | 0.0022   | -1.965 |
| MIC-1                        | Q99988  | 6 | 0.0081   | 1.28   | 6 | 0.0087   | 1.277  | 6 | 0.0022   | 1.632  | 6 | 0.0022   | 1.308  | 6 | 0.0022   | 1.524  |
| NADPH-P450<br>Oxidoreductase | P16435  | 6 | 0.0087   | 1.226  | 6 | 0.0043   | 1.448  | 6 | 0.0152   | 1.422  | 6 | 0.0043   | 1.398  | 6 | 0.0043   | 1.56   |
| Nectin-like protein<br>1     | Q8N126  | 6 | 0.0087   | 1.511  | 6 | 0.0043   | 1.367  | 6 | 0.0087   | 1.501  | 6 | 0.0022   | 1.4    | 6 | 0.0411   | 1.624  |
| NPS-PLA2                     | P14555  | 6 | 0.0022   | 1.333  | 6 | 0.0129   | 1.317  | 6 | 0.0411   | 1.792  | 6 | 0.0022   | 1.329  | 6 | 0.0087   | 1.56   |
| OSM                          | P13725  | 6 | 0.0087   | 1.341  | 6 | 0.0043   | 1.407  | 6 | 0.0152   | 1.871  | 6 | 0.0043   | 1.385  | 6 | 0.0152   | 1.634  |
| PAK7                         | Q9P286  | 6 | 0.0022   | 1.192  | 6 | 0.0022   | 1.222  | 6 | 0.0152   | 1.416  | 6 | 0.0022   | 1.257  | 6 | 0.0411   | 1.343  |
| PCSK7                        | Q16549  | 6 | 0.0043   | 1.214  | 6 | 0.0022   | 1.345  | 6 | 0.0043   | 1.44   | 6 | 0.0022   | 1.312  | 6 | 0.0087   | 1.452  |
| PDE11                        | Q9HCR9  | 6 | 0.0022   | 1.443  | 6 | 0.0043   | 1.327  | 6 | 0.0087   | 1.345  | 6 | 0.0043   | 1.251  | 6 | 0.0022   | 1.273  |
| PEDF                         | P36955  | 6 | 0.0022   | -1.648 | 6 | 0.0022   | -1.425 | 6 | 0.0022   | -2.025 | 6 | 0.0022   | -1.395 | 6 | 0.0022   | -1.61  |
| PIM1                         | P11309  | 6 | 0.0022   | 1.442  | 6 | 0.0022   | 1.361  | 6 | 0.0022   | 1.483  | 6 | 0.0043   | 1.249  | 6 | 0.0022   | 1.353  |
| Plasmin                      | P00747  | 6 | 0.0022   | 1.208  | 6 | 0.0022   | 1.247  | 6 | 0.0152   | 1.382  | 6 | 0.0022   | 1.242  | 6 | 0.026    | 1.299  |
| PIGF                         | P49763  | 6 | 0.0022   | 1.77   | 6 | 0.0022   | 1.236  | 6 | 0.0303   | 1.258  | 6 | ns       | ns     | 6 | 0.0022   | 1.318  |
| PRL                          | P01236  | 6 | 0.0022   | 1.408  | 6 | 0.0022   | 1.34   | 6 | 0.0152   | 1.377  | 6 | 0.0022   | 1.328  | 6 | 0.026    | 1.461  |
| Properdin                    | P27918  | 6 | 0.0087   | 1.252  | 6 | 0.0152   | 1.203  | 6 | 0.0087   | 1.5    | 6 | ns       | ns     | 6 | 0.0152   | 1.283  |
| Protease nexin I             | P07093  | 6 | 0.0087   | 1.381  | 6 | 0.0411   | 1.238  | 6 | 0.0411   | 2.367  | 6 | 0.026    | 1.317  | 6 | ns       | ns     |

## Supplementary Information for Multidrug AGADA Trial

Supplementary Table 1 - continued

| Protein              | Uniprot | n | G2 p-val | G2 FC  | n | G6 p-val | G6 FC  | n | G7 p-val | G7 FC  | n | G8 p-val | G8 FC  | n | G9 p-val | G9 FC  |
|----------------------|---------|---|----------|--------|---|----------|--------|---|----------|--------|---|----------|--------|---|----------|--------|
| Protein S            | P07225  | 6 | 0.0043   | -1.394 | 6 | 0.0043   | -1.2   | 6 | 0.0087   | -1.723 | 6 | ns       | ns     | 6 | 0.0043   | -1.357 |
| Rb                   | P06400  | 6 | 0.0087   | 1.402  | 6 | 0.0152   | 1.454  | 6 | 0.0152   | 1.849  | 6 | 0.0087   | 1.612  | 6 | 0.0411   | 1.888  |
| RET                  | P07949  | 6 | 0.0043   | 1.272  | 6 | 0.0022   | 1.206  | 6 | 0.0087   | 1.359  | 6 | ns       | ns     | 6 | 0.0022   | 1.345  |
| RGMA                 | Q96B86  | 6 | 0.0022   | -1.586 | 6 | 0.0022   | -1.365 | 6 | 0.0043   | -1.94  | 6 | 0.0152   | -1.32  | 6 | 0.0087   | -1.47  |
| RGM-C                | Q6ZVN8  | 6 | 0.0022   | -1.58  | 6 | 0.0043   | -1.34  | 6 | 0.0043   | -2.006 | 6 | 0.0043   | -1.417 | 6 | 0.0043   | -1.557 |
| RXFP1                | Q9HBX9  | 6 | 0.0064   | 1.258  | 6 | 0.0043   | 1.096  | 6 | 0.0087   | 1.197  | 6 | ns       | ns     | 6 | 0.0022   | 1.215  |
| S100A4               | P26447  | 6 | 0.0022   | -1.662 | 6 | 0.0022   | -1.701 | 6 | 0.0152   | -1.942 | 6 | 0.0022   | -1.613 | 6 | 0.0411   | -1.741 |
| sCD4                 | P01730  | 6 | 0.0043   | 1.29   | 6 | 0.0022   | 1.348  | 6 | 0.0087   | 1.451  | 6 | 0.0022   | 1.37   | 6 | 0.0152   | 1.51   |
| Semaphorin-6A        | Q9H2E6  | 6 | 0.0022   | -1.746 | 6 | 0.0043   | -1.472 | 6 | 0.0022   | -2.212 | 6 | 0.0043   | -1.473 | 6 | 0.0022   | -1.829 |
| sFRP-3               | Q92765  | 6 | 0.0087   | 1.385  | 6 | 0.026    | 1.226  | 6 | 0.0411   | 1.763  | 6 | 0.0411   | 1.26   | 6 | ns       | ns     |
| sICAM-3              | P32942  | 6 | 0.0087   | 1.359  | 6 | 0.0022   | 1.316  | 6 | 0.026    | 1.665  | 6 | 0.0022   | 1.339  | 6 | 0.0152   | 1.525  |
| SLAF6                | Q96DU3  | 6 | 0.005    | 1.822  | 6 | 0.005    | 1.264  | 6 | 0.005    | 1.706  | 6 | 0.045    | 1.575  | 6 | 0.0081   | 1.551  |
| SNP25                | P60880  | 6 | 0.0087   | 1.618  | 6 | 0.0022   | 1.206  | 6 | 0.0043   | 1.555  | 6 | 0.0411   | 1.146  | 6 | 0.0043   | 1.415  |
| Sphingosine kinase 1 | Q9NYA1  | 6 | 0.0022   | -1.654 | 6 | 0.0087   | -1.512 | 6 | 0.0043   | -1.803 | 6 | 0.0152   | -1.42  | 6 | 0.0087   | -1.632 |
| TAFI                 | Q96IY4  | 6 | 0.0087   | 1.193  | 6 | 0.0087   | 1.193  | 6 | 0.0161   | 1.484  | 6 | ns       | ns     | 6 | 0.045    | 1.26   |
| Testican-1           | Q08629  | 6 | 0.0087   | -1.251 | 6 | ns       | ns     | 6 | 0.0152   | -1.385 | 6 | 0.026    | -1.19  | 6 | 0.026    | -1.299 |
| TF                   | P13726  | 6 | 0.0043   | -1.566 | 6 | 0.0152   | -1.317 | 6 | 0.0043   | -1.925 | 6 | 0.0087   | -1.3   | 6 | 0.0411   | -1.428 |
| Thymidine kinase     | P04183  | 6 | 0.0043   | 1.305  | 6 | 0.0022   | 1.306  | 6 | 0.0087   | 1.474  | 6 | 0.0022   | 1.308  | 6 | 0.0087   | 1.475  |
| TNFSF15              | O95150  | 6 | 0.0022   | -1.575 | 6 | 0.0022   | -1.572 | 6 | 0.0022   | -1.528 | 6 | 0.0022   | -1.534 | 6 | 0.0022   | -1.576 |
| TNFSF18              | Q9UNG2  | 6 | 0.0087   | 1.199  | 6 | 0.0022   | 1.254  | 6 | 0.0087   | 1.429  | 6 | 0.0087   | 1.198  | 6 | 0.0152   | 1.272  |

## Supplementary Information for Multidrug AGADA Trial

Supplementary Table 1 - continued

| Protein       | Uniprot | n | G2 p-val | G2 FC  | n | G6 p-val | G6 FC  | n | G7 p-val | G7 FC  | n | G8 p-val | G8 FC  | n | G9 p-val | G9 FC  |
|---------------|---------|---|----------|--------|---|----------|--------|---|----------|--------|---|----------|--------|---|----------|--------|
| Transketolase | P29401  | 6 | 0.0022   | -1.482 | 6 | 0.0152   | -1.291 | 6 | 0.026    | -1.907 | 6 | ns       | ns     | 6 | 0.0087   | -1.568 |
| VEGF          | P15692  | 6 | 0.0087   | 1.184  | 6 | 0.0043   | 1.2    | 6 | ns       | ns     | 6 | 0.0022   | 1.306  | 6 | 0.0087   | 1.207  |
| VEGF sR3      | P35916  | 6 | 0.0022   | -2.345 | 6 | 0.0022   | -1.846 | 6 | 0.0022   | -2.794 | 6 | 0.0022   | -1.723 | 6 | 0.0043   | -2.011 |

Supplementary Information for Multidrug AGADA Trial

**Supplementary Table 1a. Summary of candidate efficacy and safety biomarkers for vamorolone and prednisolone.** Shown are proteins that were significant by Group 1 (vehicle) vs. Group 2 (prednisolone), and then also tested as significant in the two vamorolone validation groups comparisons (p<0.05; Group 1 vs. Groups 10, 11). ns indicates “not significant”

| Protein Identifying Information | Uniprot ID | Prednisolone (Group 2) |                                 |                                    | Vamorolone (Group 10) |                                 |                                    | Vamorolone + BAIBA low dose + Rituximab Treatment Group (Group 11) |                                 |                                    |
|---------------------------------|------------|------------------------|---------------------------------|------------------------------------|-----------------------|---------------------------------|------------------------------------|--------------------------------------------------------------------|---------------------------------|------------------------------------|
|                                 |            | n                      | P-value (comparison to vehicle) | Fold Change(comparison to vehicle) | n                     | P-value (comparison to vehicle) | Fold Change(comparison to vehicle) | n                                                                  | P-value (comparison to vehicle) | Fold Change(comparison to vehicle) |
| 14-3-3 protein zeta/delta       | P63104     | 6                      | 0.0087                          | -1.392                             | 6                     | ns                              | ns                                 | 6                                                                  | ns                              | ns                                 |
| AGR2                            | O95994     | 6                      | 0.0081                          | 1.206                              | 6                     | 0.045                           | 1.139                              | 6                                                                  | 0.005                           | 1.244                              |
| ALCAM                           | Q13740     | 6                      | 0.0087                          | -1.504                             | 6                     | ns                              | ns                                 | 6                                                                  | 0.0087                          | -1.291                             |
| Alkaline phosphatase, bone      | P05186     | 6                      | 0.0022                          | -2.811                             | 6                     | ns                              | ns                                 | 6                                                                  | ns                              | ns                                 |
| Apo A-I                         | P02647     | 6                      | 0.0087                          | 1.44                               | 6                     | 0.0129                          | 1.253                              | 6                                                                  | 0.0043                          | 1.45                               |
| ARSB                            | P15848     | 6                      | 0.0087                          | 1.191                              | 6                     | 0.0411                          | 1.112                              | 6                                                                  | 0.026                           | 1.187                              |
| AURKB                           | Q96GD4     | 6                      | 0.0087                          | 1.221                              | 6                     | 0.0411                          | 1.115                              | 6                                                                  | 0.0087                          | 1.145                              |
| Aurora kinase A                 | O14965     | 6                      | 0.0087                          | 1.592                              | 6                     | ns                              | ns                                 | 6                                                                  | 0.0087                          | 1.371                              |
| B7-H2                           | O75144     | 6                      | 0.0022                          | -1.173                             | 6                     | ns                              | ns                                 | 6                                                                  | ns                              | ns                                 |
| BCL2-like 1 protein             | Q07817     | 6                      | 0.0043                          | 1.288                              | 6                     | 0.0043                          | 1.183                              | 6                                                                  | 0.0022                          | 1.297                              |
| bFGF-R                          | P11362     | 6                      | 0.0022                          | -1.568                             | 6                     | ns                              | ns                                 | 6                                                                  | 0.0043                          | -1.312                             |
| BGH3                            | Q15582     | 6                      | 0.0087                          | -1.564                             | 6                     | ns                              | ns                                 | 6                                                                  | 0.0022                          | -1.632                             |
| C34 gp41 HIV Fragment           | Q70626     | 6                      | 0.0022                          | 1.671                              | 6                     | ns                              | ns                                 | 6                                                                  | ns                              | ns                                 |
| Cadherin-5                      | P33151     | 6                      | 0.0022                          | -2.122                             | 6                     | 0.0087                          | -1.286                             | 6                                                                  | 0.0022                          | -1.643                             |
| CATE                            | P14091     | 6                      | 0.0087                          | -1.408                             | 6                     | ns                              | ns                                 | 6                                                                  | 0.0152                          | -1.272                             |
| CATF                            | Q9UBX1     | 6                      | 0.0043                          | -2.782                             | 6                     | 0.0022                          | -2.682                             | 6                                                                  | ns                              | ns                                 |

## Supplementary Information for Multidrug AGADA Trial

Supplementary Table 1a - continued

| Protein           | Uniprot          | n | G2 p-val | G2 FC  | n | G10 p-val | G10 FC | n | G11 p-val | G11 FC |
|-------------------|------------------|---|----------|--------|---|-----------|--------|---|-----------|--------|
| Cathepsin A       | P10619           | 6 | 0.0087   | 1.305  | 6 | 0.026     | 1.152  | 6 | 0.026     | 1.798  |
| CD23              | P06734           | 6 | 0.0022   | 1.377  | 6 | 0.0022    | 1.307  | 6 | 0.0022    | 1.435  |
| CD30              | P28908           | 6 | 0.0022   | 1.335  | 6 | ns        | ns     | 6 | 0.0087    | 1.123  |
| CD30 Ligand       | P32971           | 6 | 0.0087   | 1.272  | 6 | 0.0087    | 1.25   | 6 | 0.0022    | 1.452  |
| CD39              | P49961           | 6 | 0.0087   | 1.24   | 6 | 0.0043    | 1.298  | 6 | 0.0022    | 1.376  |
| CD83              | Q01151           | 6 | 0.0022   | -1.274 | 6 | ns        | ns     | 6 | ns        | ns     |
| CDK2/cyclin A     | P24941<br>P20248 | 6 | 0.0022   | -1.677 | 6 | 0.0022    | -1.498 | 6 | 0.0022    | -1.672 |
| Chitotriosidase-1 | Q13231           | 6 | 0.0087   | 1.377  | 6 | 0.0087    | 1.319  | 6 | 0.0022    | 1.395  |
| Chymase           | P23946           | 6 | 0.0043   | 1.447  | 6 | ns        | ns     | 6 | 0.0087    | 1.271  |
| Ck-b-8-1          | P55773           | 6 | 0.0022   | 1.227  | 6 | 0.0043    | 1.225  | 6 | 0.0022    | 1.186  |
| CK-MB             | P12277<br>P06732 | 6 | 0.0043   | -2.402 | 6 | 0.026     | -1.734 | 6 | 0.0087    | -2.125 |
| c-Myc             | P01106           | 6 | 0.0043   | 1.498  | 6 | ns        | ns     | 6 | 0.0247    | 1.115  |
| DLL1              | O00548           | 6 | 0.0022   | -1.789 | 6 | 0.0087    | -1.273 | 6 | 0.0022    | -1.556 |
| DRAK2             | O94768           | 6 | 0.0087   | 1.43   | 6 | 0.026     | 1.33   | 6 | 0.0043    | 1.434  |
| Dtk               | Q06418           | 6 | 0.0043   | 1.204  | 6 | 0.0043    | 1.329  | 6 | 0.0022    | 1.388  |
| EGF               | P01133           | 6 | 0.0087   | 1.656  | 6 | 0.0087    | 1.241  | 6 | 0.0022    | 1.604  |
| Eotaxin-2         | O00175           | 6 | 0.0022   | 1.329  | 6 | 0.0043    | 1.136  | 6 | 0.0022    | 1.219  |
| EPHB2             | P29323           | 6 | 0.0022   | -1.387 | 6 | ns        | ns     | 6 | 0.0043    | -1.221 |
| EphB6             | O15197           | 6 | 0.0087   | -1.46  | 6 | ns        | ns     | 6 | 0.026     | -1.236 |
| FGF-17            | O60258           | 6 | 0.0049   | 1.111  | 6 | 0.005     | 1.146  | 6 | 0.0049    | 1.165  |
| FLRT3             | Q9NZU0           | 6 | 0.0087   | -1.374 | 6 | ns        | ns     | 6 | 0.0087    | -1.389 |
| FSTL1             | Q12841           | 6 | 0.0087   | -1.556 | 6 | ns        | ns     | 6 | 0.026     | -1.559 |
| GFRa-2            | O00451           | 6 | 0.0022   | -1.578 | 6 | 0.0411    | -1.163 | 6 | 0.0022    | -1.395 |
| GITR              | Q9Y5U5           | 6 | 0.0022   | -1.691 | 6 | ns        | ns     | 6 | 0.0087    | -1.323 |
| Glypican 3        | P51654           | 6 | 0.0087   | 1.882  | 6 | ns        | ns     | 6 | ns        | ns     |



## Supplementary Information for Multidrug AGADA Trial

Supplementary Table 1a - continued

| Protein                      | Uniprot | n | G2 p-val | G2 FC  | n | G10 p-val | G10 FC | n | G11 p-val | G11 FC |
|------------------------------|---------|---|----------|--------|---|-----------|--------|---|-----------|--------|
| HAI-1                        | O43278  | 6 | 0.0043   | 1.258  | 6 | 0.0043    | 1.317  | 6 | 0.0022    | 1.391  |
| HSP 90b                      | P08238  | 6 | 0.0087   | -1.53  | 6 | ns        | ns     | 6 | ns        | ns     |
| HXK1                         | P19367  | 6 | 0.0087   | 1.706  | 6 | ns        | ns     | 6 | 0.0043    | 1.333  |
| I-309                        | P22362  | 6 | 0.0043   | 1.21   | 6 | 0.0043    | 1.082  | 6 | 0.0152    | 1.13   |
| IGFBP-5                      | P24593  | 6 | 0.0087   | -1.424 | 6 | 0.0152    | -1.273 | 6 | 0.0022    | -1.434 |
| IL-12 RB2                    | Q99665  | 6 | 0.0087   | -1.275 | 6 | ns        | ns     | 6 | ns        | ns     |
| IL-18 BPa                    | O95998  | 6 | 0.0022   | -2.311 | 6 | 0.0087    | -1.215 | 6 | 0.0022    | -1.527 |
| IL-18 Rb                     | O95256  | 6 | 0.005    | 1.216  | 6 | 0.005     | 1.138  | 6 | 0.005     | 1.24   |
| IL-5 Ra                      | Q01344  | 6 | 0.0087   | 1.225  | 6 | 0.026     | 1.161  | 6 | 0.0081    | 1.215  |
| IL-8                         | P10145  | 6 | 0.0043   | 1.185  | 6 | 0.0152    | 1.166  | 6 | 0.0022    | 1.383  |
| JAG1                         | P78504  | 6 | 0.0087   | -1.342 | 6 | ns        | ns     | 6 | 0.0087    | -1.303 |
| LAG-1                        | Q8NHW4  | 6 | 0.0022   | 1.253  | 6 | 0.0043    | 1.253  | 6 | 0.005     | 1.317  |
| LEG9                         | O00182  | 6 | 0.0087   | 1.464  | 6 | ns        | ns     | 6 | 0.0087    | 1.258  |
| LGMN                         | Q99538  | 6 | 0.0022   | -1.301 | 6 | 0.026     | -1.228 | 6 | 0.0087    | -1.386 |
| LSAMP                        | Q13449  | 6 | 0.0022   | -1.767 | 6 | ns        | ns     | 6 | 0.0022    | -1.397 |
| MATN2                        | O00339  | 6 | 0.0043   | -1.712 | 6 | 0.0087    | -1.466 | 6 | 0.0022    | -1.844 |
| MIC-1                        | Q99988  | 6 | 0.0081   | 1.28   | 6 | 0.0152    | 1.189  | 6 | 0.0022    | 1.322  |
| NADPH-P450<br>Oxidoreductase | P16435  | 6 | 0.0087   | 1.226  | 6 | 0.0087    | 1.314  | 6 | 0.0043    | 1.496  |
| Nectin-like<br>protein 1     | Q8N126  | 6 | 0.0087   | 1.511  | 6 | 0.0043    | 1.409  | 6 | 0.0043    | 1.478  |
| NPS-PLA2                     | P14555  | 6 | 0.0022   | 1.333  | 6 | 0.0103    | 1.313  | 6 | 0.0022    | 61.215 |
| OSM                          | P13725  | 6 | 0.0087   | 1.341  | 6 | 0.0152    | 1.29   | 6 | 0.0022    | 1.432  |
| PAK7                         | Q9P286  | 6 | 0.0022   | 1.192  | 6 | 0.0087    | 1.215  | 6 | 0.0022    | 1.292  |
| PCSK7                        | Q16549  | 6 | 0.0043   | 1.214  | 6 | 0.0087    | 1.249  | 6 | 0.0022    | 1.344  |
| PDE11                        | Q9HCR9  | 6 | 0.0022   | 1.443  | 6 | ns        | ns     | 6 | ns        | ns     |
| PEDF                         | P36955  | 6 | 0.0022   | -1.648 | 6 | ns        | ns     | 6 | 0.0152    | -1.235 |
| PIM1                         | P11309  | 6 | 0.0022   | 1.442  | 6 | 0.026     | 1.168  | 6 | 0.0043    | 1.174  |

## Supplementary Information for Multidrug AGADA Trial

Supplementary Table 1a - continued

| Protein              | Uniprot | n | G2 p-val | G2 FC  | n | G10 p-val | G10 FC | n | G11 p-val | G11 FC |
|----------------------|---------|---|----------|--------|---|-----------|--------|---|-----------|--------|
| Plasmin              | P00747  | 6 | 0.0022   | 1.208  | 6 | 0.0087    | 1.195  | 6 | 0.0081    | 1.228  |
| PIGF                 | P49763  | 6 | 0.0022   | 1.77   | 6 | 0.0411    | 1.073  | 6 | 0.0411    | 1.14   |
| PRL                  | P01236  | 6 | 0.0022   | 1.408  | 6 | 0.0087    | 1.345  | 6 | 0.0087    | 1.319  |
| Properdin            | P27918  | 6 | 0.0087   | 1.252  | 6 | 0.026     | 1.2    | 6 | 0.0022    | 1.373  |
| Protease nexin I     | P07093  | 6 | 0.0087   | 1.381  | 6 | ns        | ns     | 6 | 0.0022    | 1.478  |
| Protein S            | P07225  | 6 | 0.0043   | -1.394 | 6 | ns        | ns     | 6 | 0.0022    | -1.258 |
| Rb                   | P06400  | 6 | 0.0087   | 1.402  | 6 | 0.0152    | 1.386  | 6 | 0.0022    | 1.568  |
| RET                  | P07949  | 6 | 0.0043   | 1.272  | 6 | 0.0081    | 1.16   | 6 | 0.0022    | 1.203  |
| RGMA                 | Q96B86  | 6 | 0.0022   | -1.586 | 6 | ns        | ns     | 6 | 0.0022    | -1.298 |
| RGM-C                | Q6ZVN8  | 6 | 0.0022   | -1.58  | 6 | ns        | ns     | 6 | ns        | ns     |
| RXFP1                | Q9HBX9  | 6 | 0.0064   | 1.258  | 6 | 0.0087    | 1.093  | 6 | 0.0087    | 1.08   |
| S100A4               | P26447  | 6 | 0.0022   | -1.662 | 6 | 0.0022    | -1.588 | 6 | 0.026     | -1.647 |
| sCD4                 | P01730  | 6 | 0.0043   | 1.29   | 6 | 0.0022    | 1.352  | 6 | 0.0022    | 1.5    |
| Semaphorin-6A        | Q9H2E6  | 6 | 0.0022   | -1.746 | 6 | 0.0043    | -1.321 | 6 | 0.0022    | -1.49  |
| sFRP-3               | Q92765  | 6 | 0.0087   | 1.385  | 6 | 0.026     | 1.188  | 6 | 0.0087    | 1.322  |
| sICAM-3              | P32942  | 6 | 0.0087   | 1.359  | 6 | 0.0087    | 1.292  | 6 | 0.0022    | 1.324  |
| SLAF6                | Q96DU3  | 6 | 0.005    | 1.822  | 6 | 0.0081    | 1.2    | 6 | 0.005     | 1.313  |
| SNP25                | P60880  | 6 | 0.0087   | 1.618  | 6 | ns        | ns     | 6 | 0.0087    | 1.17   |
| Sphingosine kinase 1 | Q9NYA1  | 6 | 0.0022   | -1.654 | 6 | ns        | ns     | 6 | 0.0152    | -1.287 |
| TAFI                 | Q96IY4  | 6 | 0.0087   | 1.193  | 6 | 0.0043    | 1.163  | 6 | 0.0022    | 1.24   |
| Testican-1           | Q08629  | 6 | 0.0087   | -1.251 | 6 | 0.026     | -1.15  | 6 | 0.0022    | -1.211 |
| TF                   | P13726  | 6 | 0.0043   | -1.566 | 6 | ns        | ns     | 6 | 0.0411    | -1.253 |
| Thymidine kinase     | P04183  | 6 | 0.0043   | 1.305  | 6 | 0.0022    | 1.262  | 6 | 0.0022    | 1.368  |
| TNFSF15              | O95150  | 6 | 0.0022   | -1.575 | 6 | 0.0022    | -1.383 | 6 | 0.0022    | -1.371 |
| TNFSF18              | Q9UNG2  | 6 | 0.0087   | 1.199  | 6 | 0.0087    | 1.141  | 6 | 0.0022    | 1.228  |

## Supplementary Information for Multidrug AGADA Trial

Supplementary Table 1a - continued

| Protein       | Uniprot | n | G2 p-val | G2 FC  | n | G10 p-val | G10 FC | n | G11 p-val | G11 FC |
|---------------|---------|---|----------|--------|---|-----------|--------|---|-----------|--------|
| Transketolase | P29401  | 6 | 0.0022   | -1.482 | 6 | ns        | ns     | 6 | 0.0043    | -1.538 |
| VEGF          | P15692  | 6 | 0.0087   | 1.184  | 6 | 0.0152    | 1.16   | 6 | 0.0152    | 1.142  |
| VEGF sR3      | P35916  | 6 | 0.0022   | -2.345 | 6 | ns        | ns     | 6 | 0.0022    | -1.556 |

Supplementary Information for Multidrug AGADA Trial

**Supplementary Table 2. Results of this study applied to the list of significant proteins found by Hathout et al. 2016.** Gold and pale yellow, results below 100±10%, Green, protein is down regulated in humans, Red, protein is upregulated in humans.

| Human Glucocorticoid Responsive Biomarker | UniProt ID | Vehicle        |               |                     | Prednisolone |                     | Rituximab + prednisolone |                     | BIABA low dose + prednisolone |                     | BIABA high dose + prednisolone |                     | BIABA low dose + Rituximab + prednisolone |                     | Vamorolone + BAIBA low dose + Rituximab treatment group |                     |
|-------------------------------------------|------------|----------------|---------------|---------------------|--------------|---------------------|--------------------------|---------------------|-------------------------------|---------------------|--------------------------------|---------------------|-------------------------------------------|---------------------|---------------------------------------------------------|---------------------|
|                                           |            | Mean ± SD      | Mean ± SD     | P value vs. vehicle | Mean ± SD    | P value vs. vehicle | Mean ± SD                | P value vs. vehicle | Mean ± SD                     | P value vs. vehicle | Mean ± SD                      | P value vs. vehicle | Mean ± SD                                 | P value vs. vehicle | Mean ± SD                                               | P value vs. vehicle |
| 6Ckine                                    | O00585     | 213.6 ± 22.9   | 190.9 ± 19.5  | 0.132               | 201.2 ± 10.7 | 0.485               | 201.2 ± 23.1             | 0.485               | 214.9 ± 21                    | 0.818               | 213.5 ± 34.9                   | 0.937               | 209.1 ± 17.1                              | 0.699               | 210 ± 13.8                                              | 0.937               |
| a1-Antitrypsin                            | P01009     | 2940.9 ± 233.8 | 2683 ± 676.5  | 0.818               | 2807 ± 248.2 | 0.485               | 3520.4 ± 535.1           | 0.065               | 2937 ± 330.7                  | 0.818               | 2763.2 ± 265.6                 | 0.31                | 2967.1 ± 115.6                            | 0.699               | 2933.8 ± 137.7                                          | 1                   |
| Afamin                                    | P43652     | 253.5 ± 60.1   | 393.5 ± 93.4  | 0.026               | 394.6 ± 87.6 | 0.009               | 679.5 ± 366.8            | 0.026               | 410.1 ± 119.2                 | 0.015               | 509.3 ± 289.2                  | 0.065               | 374.8 ± 74.4                              | 0.015               | 471.9 ± 93.6                                            | 0.002               |
| Angiopietin-2                             | O15123     | 61.3 ± 20.2    | 52.7 ± 17.8   | 0.31                | 50.8 ± 6.4   | 0.078               | 36.5 ± 17.7              | 0.065               | 44 ± 12.6                     | 0.132               | 47.1 ± 12.8                    | 0.24                | 55.1 ± 4.7                                | 0.132               | 49.1 ± 11.6                                             | 0.24                |
| Angiotensinogen                           | P01019     | 102.4 ± 70.2   | 143.2 ± 45.2  | 0.24                | 129.8 ± 67.3 | 0.485               | 119.6 ± 56.3             | 0.937               | 127 ± 68.4                    | 0.699               | 122.5 ± 58                     | 0.24                | 88 ± 51.6                                 | 0.818               | 142.7 ± 66.9                                            | 0.485               |
| C1r                                       | P00736     | 28.4 ± 4.5     | 28.1 ± 6.3    | 1                   | 26.5 ± 3.5   | 0.394               | 21.3 ± 7.6               | 0.093               | 28.7 ± 4.7                    | 0.937               | 25.4 ± 7.1                     | 0.485               | 28.5 ± 2.3                                | 0.937               | 23.1 ± 4.1                                              | 0.065               |
| CD23                                      | P06734     | 162.4 ± 20.9   | 223.6 ± 37.6  | 0.002               | 219.4 ± 32.9 | 0.002               | 281.9 ± 86.1             | 0.026               | 219.4 ± 34                    | 0.004               | 266.6 ± 102.6                  | 0.026               | 212.3 ± 26                                | 0.002               | 233.1 ± 33.9                                            | 0.002               |
| CD36 ANTIGEN                              | P16671     | 267.8 ± 15.9   | 279.6 ± 18.4  | 0.24                | 288.6 ± 7.2  | 0.045               | 379.4 ± 212.2            | 0.041               | 294.2 ± 19.6                  | 0.026               | 372.4 ± 227.2                  | 0.093               | 278.6 ± 3.6                               | 0.132               | 301.6 ± 10.6                                            | 0.004               |
| CNDP1                                     | Q96KN2     | 209.5 ± 109.5  | 252.5 ± 130.1 | 0.336               | 188.4 ± 90.4 | 1                   | 290.1 ± 106.2            | 0.18                | 211.6 ± 99.3                  | 0.937               | 190.1 ± 77.2                   | 0.937               | 163.6 ± 32.7                              | 0.818               | 280.1 ± 114                                             | 0.31                |

## Supplementary Information for Multidrug AGADA Trial

Supplementary Table 2 - continued

| Protein                  | Uniprot | G1 mean             | G2 mean            | G2 p-value | G6 mean           | G6 p-value | G7 mean           | G7 p-value | G8 mean           | G8 p-value | G9 mean          | G9 p-value | G10 mean          | G10 p-value | G11 mean          | G11 p-value |
|--------------------------|---------|---------------------|--------------------|------------|-------------------|------------|-------------------|------------|-------------------|------------|------------------|------------|-------------------|-------------|-------------------|-------------|
| CNTF                     | P26441  | 50 ± 7.8            | 53.9 ± 18.7        | 0.699      | 52.6 ± 11.7       | 0.937      | 43.7 ± 7          | 0.18       | 43.6 ± 7.2        | 0.18       | 46.8 ± 9.8       | 0.485      | 49.2 ± 5.5        | 0.63        | 45.1 ± 3.9        | 0.199       |
| CRDL1                    | Q9BU40  | 2375 ± 349.2        | 2216.6 ± 592.6     | 0.818      | 2471.8 ± 525.7    | 0.589      | 1708.4 ± 559      | 0.065      | 2305.6 ± 434.8    | 0.31       | 1942.5 ± 469.7   | 0.18       | 2222.8 ± 421.7    | 0.485       | 1998.3 ± 444.1    | 0.132       |
| EMR2                     | Q9UHX3  | 68.6 ± 10           | 64.8 ± 10.8        | 0.485      | 68 ± 5.2          | 1          | 55.6 ± 15.3       | 0.132      | 61.7 ± 15.3       | 0.485      | 69.8 ± 9.8       | 1          | 69.2 ± 8.4        | 0.937       | 63.1 ± 5.2        | 0.422       |
| Fibrinogen g-chain dimer | P02679  | 355862.8 ± 186762.6 | 136884.3 ± 83592.8 | 0.065      | 21166.8 ± 16152.5 | 0.18       | 12226.8 ± 18565.8 | 0.026      | 19467.5 ± 17486.1 | 0.093      | 1808.9 ± 2043.35 | 0.132      | 28324.4 ± 20023.2 | 0.699       | 13364.7 ± 11356.7 | 0.041       |
| Growth hormone receptor  | P10912  | 70.4 ± 8.6          | 98.7 ± 57.2        | 0.31       | 76.8 ± 6.1        | 0.336      | 94.5 ± 21.6       | 0.065      | 77.2 ± 5          | 0.18       | 85.4 ± 14.3      | 0.041      | 73.2 ± 2.5        | 0.937       | 78.7 ± 7.3        | 0.132       |
| IFN-αA                   | P01563  | 50.5 ± 2.9          | 44.7 ± 4.7         | 0.026      | 48.5 ± 2.4        | 0.18       | 43.2 ± 5.1        | 0.054      | 47.1 ± 11         | 0.699      | 48.3 ± 4.9       | 0.18       | 48.6 ± 2.7        | 0.394       | 44.3 ± 1.7        | 0.002       |
| IGFBP-1                  | P08833  | 6498.2 ± 5856.6     | 6813.4 ± 11483.7   | 0.394      | 9229.5 ± 8950.7   | 0.937      | 7903.3 ± 11823.5  | 0.589      | 9835.4 ± 18269.7  | 0.485      | 9577.9 ± 1047.2  | 0.937      | 8410.1 ± 8158.1   | 0.699       | 6952.6 ± 6554     | 0.818       |
| IGFBP-2                  | P18065  | 75479.5 ± 35786.8   | 41044.7 ± 19228.3  | 0.132      | 46423.2 ± 15079.7 | 0.132      | 45864 ± 31101.3   | 0.24       | 61239.9 ± 33214.6 | 0.31       | 5099.1 ± 1406.4  | 0.132      | 10400.5 ± 30129.4 | 0.132       | 78348.9 ± 21952.5 | 0.699       |
| IgM                      | P01871  | 107.7 ± 9.7         | 159.7 ± 88.3       | 0.093      | 113.4 ± 4.8       | 0.18       | 138.1 ± 26.1      | 0.015      | 335.3 ± 364.6     | 0.18       | 134.3 ± 39.8     | 0.065      | 104 ± 7.1         | 0.699       | 114.3 ± 10        | 0.24        |
| IL-22BP                  | Q969J5  | 140.8 ± 9.1         | 143.9 ± 36.6       | 0.24       | 132.9 ± 3.6       | 0.093      | 125.2 ± 10.4      | 0.026      | 140.4 ± 7.8       | 0.937      | 140.2 ± 14.9     | 0.699      | 134.7 ± 5.7       | 0.18        | 138.6 ± 5.1       | 0.589       |
| Insulin                  | P01308  | 60.4 ± 10.1         | 56.4 ± 9.1         | 0.394      | 58 ± 6.2          | 0.485      | 42.7 ± 18.9       | 0.132      | 64.1 ± 19.3       | 0.937      | 58.1 ± 16.3      | 0.589      | 55.5 ± 8.2        | 0.24        | 121.2 ± 169.7     | 0.31        |

## Supplementary Information for Multidrug AGADA Trial

Supplementary Table 2 - continued

| Protein           | Uniprot        | G1 mean           | G2 mean          | G2 p-value | G6 mean          | G6 p-value | G7 mean          | G7 p-value | G8 mean         | G8 p-value | G9 mean          | G9 p-value | G10 mean        | G10 p-value | G11 mean        | G11 p-value |
|-------------------|----------------|-------------------|------------------|------------|------------------|------------|------------------|------------|-----------------|------------|------------------|------------|-----------------|-------------|-----------------|-------------|
| Integrin a1b1     | P56199, P05556 | 19102.8 ± 11950.5 | 13965.2 ± 7411.5 | 0.485      | 12266.8 ± 4502.2 | 0.31       | 13771.5 ± 4876.4 | 0.485      | 12889 ± 6162    | 0.24       | 11984.5 ± 4706.7 | 0.093      | 17062.4 ± 10780 | 0.485       | 18197.1 ± 14346 | 0.818       |
| Leptin            | P41159         | 453.7 ± 30.6      | 479.1 ± 65.8     | 0.818      | 431.4 ± 24.4     | 0.24       | 437.6 ± 37       | 0.818      | 444.4 ± 75.8    | 0.24       | 423.8 ± 31.9     | 0.24       | 406.8 ± 31.6    | 0.041       | 438.5 ± 36.3    | 0.589       |
| LY9               | Q9HBG7         | 65.2 ± 36.3       | 65.1 ± 22.6      | 0.485      | 73.8 ± 35.7      | 0.199      | 43.3 ± 17.6      | 0.18       | 82.1 ± 77.7     | 0.818      | 55.9 ± 11.6      | 1          | 57.6 ± 6.5      | 0.575       | 49.5 ± 5.8      | 0.699       |
| Lymphotoxin a2/b1 | P01374, Q06643 | 355.2 ± 29        | 388.5 ± 57.9     | 0.18       | 386.8 ± 34.1     | 0.132      | 509.6 ± 128      | 0.065      | 358.8 ± 60.6    | 0.589      | 375 ± 37.2       | 0.31       | 362.4 ± 25.1    | 0.589       | 372.4 ± 23.4    | 0.394       |
| M-CSF R           | P07333         | 56.4 ± 8.1        | 57 ± 18.3        | 0.485      | 55.4 ± 5.5       | 0.699      | 49.2 ± 8.5       | 0.24       | 54.9 ± 10.9     | 0.485      | 51.7 ± 11.8      | 0.485      | 55.5 ± 4.3      | 0.485       | 47.3 ± 3        | 0.065       |
| MDC               | O00626         | 113.2 ± 7.5       | 114.2 ± 9.1      | 0.937      | 116.8 ± 5.9      | 0.394      | 111 ± 10.5       | 0.937      | 115.6 ± 11.3    | 0.229      | 119.8 ± 7.9      | 0.31       | 116.2 ± 9.1     | 0.937       | 141.7 ± 62.6    | 0.18        |
| MMP-12            | P39900         | 48.9 ± 8.1        | 47 ± 10.4        | 0.937      | 43.6 ± 4.9       | 0.394      | 34.1 ± 14.2      | 0.093      | 43.6 ± 8.9      | 0.422      | 42 ± 13          | 0.31       | 45.9 ± 6.7      | 0.262       | 39.6 ± 6.8      | 0.065       |
| MMP-3             | P08254         | 163.8 ± 19.7      | 185 ± 22.8       | 0.18       | 182.9 ± 16.1     | 0.132      | 213.3 ± 51.3     | 0.132      | 194.1 ± 28.8    | 0.065      | 196.8 ± 30.9     | 0.109      | 185.6 ± 16.2    | 0.065       | 207.3 ± 26.8    | 0.026       |
| MPIF-1            | P55773         | 185.6 ± 14.6      | 199.8 ± 12.4     | 0.132      | 219.3 ± 19.4     | 0.004      | 220.5 ± 28.8     | 0.025      | 215.4 ± 23.5    | 0.015      | 243.2 ± 35.6     | 0.002      | 207.6 ± 12      | 0.015       | 213 ± 16.7      | 0.015       |
| NCAM-120          | P13591         | 162.8 ± 45.2      | 194.2 ± 40.6     | 0.31       | 126.8 ± 27.6     | 0.18       | 264.6 ± 196.6    | 0.485      | 160.8 ± 93      | 0.589      | 128.1 ± 41.9     | 0.31       | 141.4 ± 45.9    | 0.18        | 223.6 ± 97.6    | 0.31        |
| P-Cadherin        | P22223         | 5757.7 ± 881.4    | 5128.4 ± 783.7   | 0.31       | 5538.8 ± 630     | 1          | 4529.2 ± 1432.9  | 0.18       | 5464.9 ± 1076.1 | 0.485      | 4988.4 ± 1107.5  | 0.31       | 5350.6 ± 494.5  | 0.485       | 6234.1 ± 3581.5 | 0.18        |
| Protein C         | P04070         | 335.6 ± 57.6      | 415.1 ± 126.1    | 0.485      | 401 ± 96         | 0.394      | 773.2 ± 348.5    | 0.026      | 430.1 ± 107.9   | 0.18       | 479.6 ± 216.3    | 0.24       | 433.9 ± 164.8   | 0.18        | 503.8 ± 110.6   | 0.015       |

## Supplementary Information for Multidrug AGADA Trial

Supplementary Table 2 - continued

| Protein                     | Uniprot | G1 mean      | G2 mean       | G2 p-value | G6 mean        | G6 p-value | G7 mean       | G7 p-value | G8 mean       | G8 p-value | G9 mean       | G9 p-value | G10 mean      | G10 p-value | G11 mean      | G11 p-value |
|-----------------------------|---------|--------------|---------------|------------|----------------|------------|---------------|------------|---------------|------------|---------------|------------|---------------|-------------|---------------|-------------|
| Protein disulfide-isomerase | P07237  | 99.3 ± 14.7  | 82.1 ± 16.3   | 0.132      | 90 ± 9.7       | 0.31       | 75.9 ± 17.4   | 0.041      | 81.3 ± 18.4   | 0.093      | 83 ± 18.9     | 0.18       | 94.8 ± 11.2   | 0.394       | 88.1 ± 13.4   | 0.31        |
| Resistin                    | Q9HD89  | 194.8 ± 12.8 | 328.7 ± 162.4 | 0.015      | 226.2 ± 40.4   | 0.093      | 280.1 ± 76.7  | 0.002      | 267.5 ± 128.7 | 0.065      | 322.6 ± 192.2 | 0.026      | 195.8 ± 7.1   | 0.937       | 309.1 ± 135.8 | 0.009       |
| SLIK5                       | O94991  | 380.7 ± 43   | 268.3 ± 53.1  | 0.004      | 318.9 ± 57.3   | 0.065      | 225.8 ± 111.7 | 0.015      | 300.7 ± 65.7  | 0.041      | 297.4 ± 99.5  | 0.132      | 349.7 ± 41.3  | 0.31        | 300.5 ± 37.1  | 0.009       |
| TECK                        | O15444  | 85.2 ± 7.1   | 99.4 ± 14     | 0.045      | 100.5 ± 6.5    | 0.015      | 95.3 ± 11.1   | 0.093      | 96.2 ± 9.7    | 0.041      | 102.1 ± 10.9  | 0.015      | 99.4 ± 9.3    | 0.015       | 98.9 ± 4.6    | 0.009       |
| Testican-2                  | Q92563  | 604.5 ± 27.1 | 895.7 ± 162.8 | 0.002      | 1003.4 ± 164.6 | 0.002      | 821.4 ± 408.3 | 0.699      | 863.7 ± 199   | 0.004      | 740.2 ± 378.6 | 1          | 568.8 ± 110.3 | 0.394       | 550.4 ± 142.3 | 0.24        |

Supplementary Information for Multidrug AGADA Trial

**Supplementary Table 3. Summary of candidate efficacy and safety biomarkers for BAIBA low dose.** Shown are proteins that were significant by Group 1 (vehicle) vs. Group 4 (BAIBA low dose), and then also tested as significant in all three of the validation group comparisons (p<0.05; Group 4 vs. Groups 7, 9, or 11).

| Protein Identifying Information | Uniprot ID | BAIBA low dose (Group 4) |                                 |                                     | BAIBA low dose + Prednisolone Treatment Group (Group 7) |                                 |                                     | BAIBA low dose + Rituximab + Prednisolone Group (Group 9) |                                 |                                     | Vamorolone + BAIBA low dose + Rituximab Treatment Group (Group 11) |                                 |                                     |
|---------------------------------|------------|--------------------------|---------------------------------|-------------------------------------|---------------------------------------------------------|---------------------------------|-------------------------------------|-----------------------------------------------------------|---------------------------------|-------------------------------------|--------------------------------------------------------------------|---------------------------------|-------------------------------------|
|                                 |            | n                        | P-value (comparison to vehicle) | Fold Change (comparison to vehicle) | n                                                       | P-value (comparison to vehicle) | Fold Change (comparison to vehicle) | n                                                         | P-value (comparison to vehicle) | Fold Change (comparison to vehicle) | n                                                                  | P-value (comparison to vehicle) | Fold Change (comparison to vehicle) |
| p53                             | P04637     | 6                        | 0.0022                          | 1.27                                | 6                                                       | 0.0411                          | 1.654                               | 6                                                         | 0.0411                          | 1.345                               | 6                                                                  | 0.0022                          | 1.223                               |
| S100A4                          | P26447     | 6                        | 0.0043                          | -1.493                              | 6                                                       | 0.0152                          | -1.942                              | 6                                                         | 0.0411                          | -1.741                              | 6                                                                  | 0.026                           | -1.647                              |
| Prothrombin                     | P00734     | 6                        | 0.0043                          | -1.352                              | 6                                                       | 0.026                           | -1.716                              | 6                                                         | 0.026                           | -1.294                              | 6                                                                  | 0.0043                          | -1.285                              |
| SLAF6                           | Q96DU3     | 6                        | 0.005                           | 1.325                               | 6                                                       | 0.005                           | 1.706                               | 6                                                         | 0.0081                          | 1.551                               | 6                                                                  | 0.005                           | 1.313                               |
| Protein S                       | P07225     | 6                        | 0.0087                          | -1.277                              | 6                                                       | 0.0087                          | -1.723                              | 6                                                         | 0.0043                          | -1.357                              | 6                                                                  | 0.0022                          | -1.258                              |
| IL-13                           | P35225     | 6                        | 0.0087                          | 1.274                               | 6                                                       | 0.0411                          | 1.605                               | 6                                                         | 0.0129                          | 1.659                               | 6                                                                  | 0.0043                          | 1.316                               |
| CD30 Ligand                     | P32971     | 6                        | 0.0087                          | 1.283                               | 6                                                       | 0.0411                          | 1.62                                | 6                                                         | 0.026                           | 1.467                               | 6                                                                  | 0.0022                          | 1.452                               |
| HIPK3                           | Q9H422     | 6                        | 0.0087                          | 1.181                               | 6                                                       | 0.0152                          | 1.181                               | 6                                                         | 0.0087                          | 1.396                               | 6                                                                  | 0.0152                          | 1.254                               |
| IL-8                            | P10145     | 6                        | 0.0087                          | 1.148                               | 6                                                       | 0.026                           | 1.298                               | 6                                                         | 0.026                           | 1.281                               | 6                                                                  | 0.0022                          | 1.383                               |
| Transketolase                   | P29401     | 6                        | 0.0087                          | -1.383                              | 6                                                       | 0.026                           | -1.907                              | 6                                                         | 0.0087                          | -1.568                              | 6                                                                  | 0.0043                          | -1.538                              |



Supplementary Information for Multidrug AGADA Trial

**Supplementary Table 4. Summary of candidate efficacy and safety biomarkers for BAIBA high dose.** Shown are proteins that were significant by Group 1 (vehicle) vs. Group 5 (BAIBA low dose), and then also tested as significant in the validation group comparison ( $p < 0.05$ ; Group 5 vs. Groups 8).

| Protein Identifying Information | Uniprot ID | BAIBA high Treatment Group (Group 5) |                                 |                                     | BAIBA high dose + Prednisolone Treatment Group (Group 8) |                                 |                                     |
|---------------------------------|------------|--------------------------------------|---------------------------------|-------------------------------------|----------------------------------------------------------|---------------------------------|-------------------------------------|
|                                 |            | n                                    | P-value (comparison to vehicle) | Fold Change (comparison to vehicle) | n                                                        | P-value (comparison to vehicle) | Fold Change (comparison to vehicle) |
| Cathepsin G                     | P08311     | 5                                    | 0.0043                          | 1.237                               | 6                                                        | 0.0022                          | 1.215                               |
| Ephrin-B3                       | Q15768     | 5                                    | 0.0043                          | 1.235                               | 6                                                        | 0.0043                          | 1.218                               |
| PRL                             | P01236     | 5                                    | 0.0043                          | 1.35                                | 6                                                        | 0.0022                          | 1.328                               |
| BCMA                            | Q02223     | 5                                    | 0.0043                          | 1.245                               | 6                                                        | 0.0087                          | 1.249                               |
| Ck-b-8-1                        | P55773     | 5                                    | 0.0043                          | 2.773                               | 6                                                        | 0.0087                          | 2.639                               |
| sCD4                            | P01730     | 5                                    | 0.0043                          | 1.344                               | 6                                                        | 0.0022                          | 1.37                                |
| IL-2 sRa                        | P01589     | 5                                    | 0.0043                          | 1.384                               | 6                                                        | 0.0087                          | 1.309                               |
| CD39                            | P49961     | 5                                    | 0.0043                          | 1.292                               | 6                                                        | 0.0022                          | 1.372                               |
| CD109                           | Q6YHK3     | 5                                    | 0.0043                          | 1.377                               | 6                                                        | 0.0043                          | 1.34                                |
| CYTF                            | O76096     | 5                                    | 0.0043                          | 1.13                                | 6                                                        | 0.0411                          | 1.149                               |
| FCG2B                           | P31994     | 5                                    | 0.0043                          | 1.214                               | 6                                                        | 0.0411                          | 1.211                               |
| Chitotriosidase-1               | Q13231     | 5                                    | 0.0043                          | 1.399                               | 6                                                        | 0.0022                          | 1.356                               |
| Plasmin                         | P00747     | 5                                    | 0.0043                          | 1.257                               | 6                                                        | 0.0022                          | 1.242                               |
| Thymidine kinase                | P04183     | 5                                    | 0.0043                          | 1.328                               | 6                                                        | 0.0022                          | 1.308                               |
| PCSK7                           | Q16549     | 5                                    | 0.0043                          | 1.34                                | 6                                                        | 0.0022                          | 1.312                               |
| EGF                             | P01133     | 5                                    | 0.0043                          | 1.335                               | 6                                                        | 0.0087                          | 1.307                               |
| INGR2                           | P38484     | 5                                    | 0.0043                          | 1.249                               | 6                                                        | 0.026                           | 1.334                               |
| IL-18 Rb                        | O95256     | 5                                    | 0.008                           | 1.147                               | 6                                                        | 0.005                           | 1.171                               |
| SLAF6                           | Q96DU3     | 5                                    | 0.008                           | 1.486                               | 6                                                        | 0.045                           | 1.575                               |
| FGF-8B                          | P55075     | 5                                    | 0.0087                          | 1.458                               | 6                                                        | 0.0087                          | 1.486                               |
| Dtk                             | Q06418     | 5                                    | 0.0087                          | 1.251                               | 6                                                        | 0.0043                          | 1.349                               |

Supplementary Table 4 – continued

## Supplementary Information for Multidrug AGADA Trial

| <b>Protein</b>              | <b>Uniprot</b> | <b>n</b> | <b>G5 p-value</b> | <b>G5 FC</b> | <b>n</b> | <b>G8 p-value</b> | <b>G8 FC</b> |
|-----------------------------|----------------|----------|-------------------|--------------|----------|-------------------|--------------|
| NADPH-P450 Oxidoreductase   | P16435         | 5        | 0.0087            | 1.368        | 6        | 0.0043            | 1.398        |
| IL-17F                      | Q96PD4         | 5        | 0.0087            | 1.383        | 6        | 0.0411            | 1.372        |
| HAI-1                       | O43278         | 5        | 0.0087            | 1.307        | 6        | 0.0022            | 1.344        |
| Midkine                     | P21741         | 5        | 0.0087            | 1.436        | 6        | 0.0087            | 1.466        |
| ER                          | P03372         | 5        | 0.0087            | 1.328        | 6        | 0.0087            | 1.395        |
| NET4                        | Q9HB63         | 5        | 0.0087            | 1.212        | 6        | 0.0152            | 1.277        |
| IL-15 Ra                    | Q13261         | 5        | 0.0087            | 1.353        | 6        | 0.0043            | 1.343        |
| Discoidin domain receptor 2 | Q16832         | 5        | 0.0087            | -1.123       | 6        | 0.0152            | -1.112       |
| MMEL2                       | Q495T6         | 5        | 0.0087            | 1.379        | 6        | 0.0022            | 1.406        |
| Nectin-like protein 1       | Q8N126         | 5        | 0.0087            | 1.352        | 6        | 0.0022            | 1.4          |
| ADAM 9                      | Q13443         | 5        | 0.0087            | 1.539        | 6        | 0.0152            | 1.629        |
| MIC-1                       | Q99988         | 5        | 0.0087            | 1.285        | 6        | 0.0022            | 1.308        |
| BCL2-like 1 protein         | Q07817         | 5        | 0.0087            | 1.303        | 6        | 0.026             | 1.185        |
| Rb                          | P06400         | 5        | 0.0087            | 1.697        | 6        | 0.0087            | 1.612        |

# Supplementary Information for Multidrug AGADA Trial

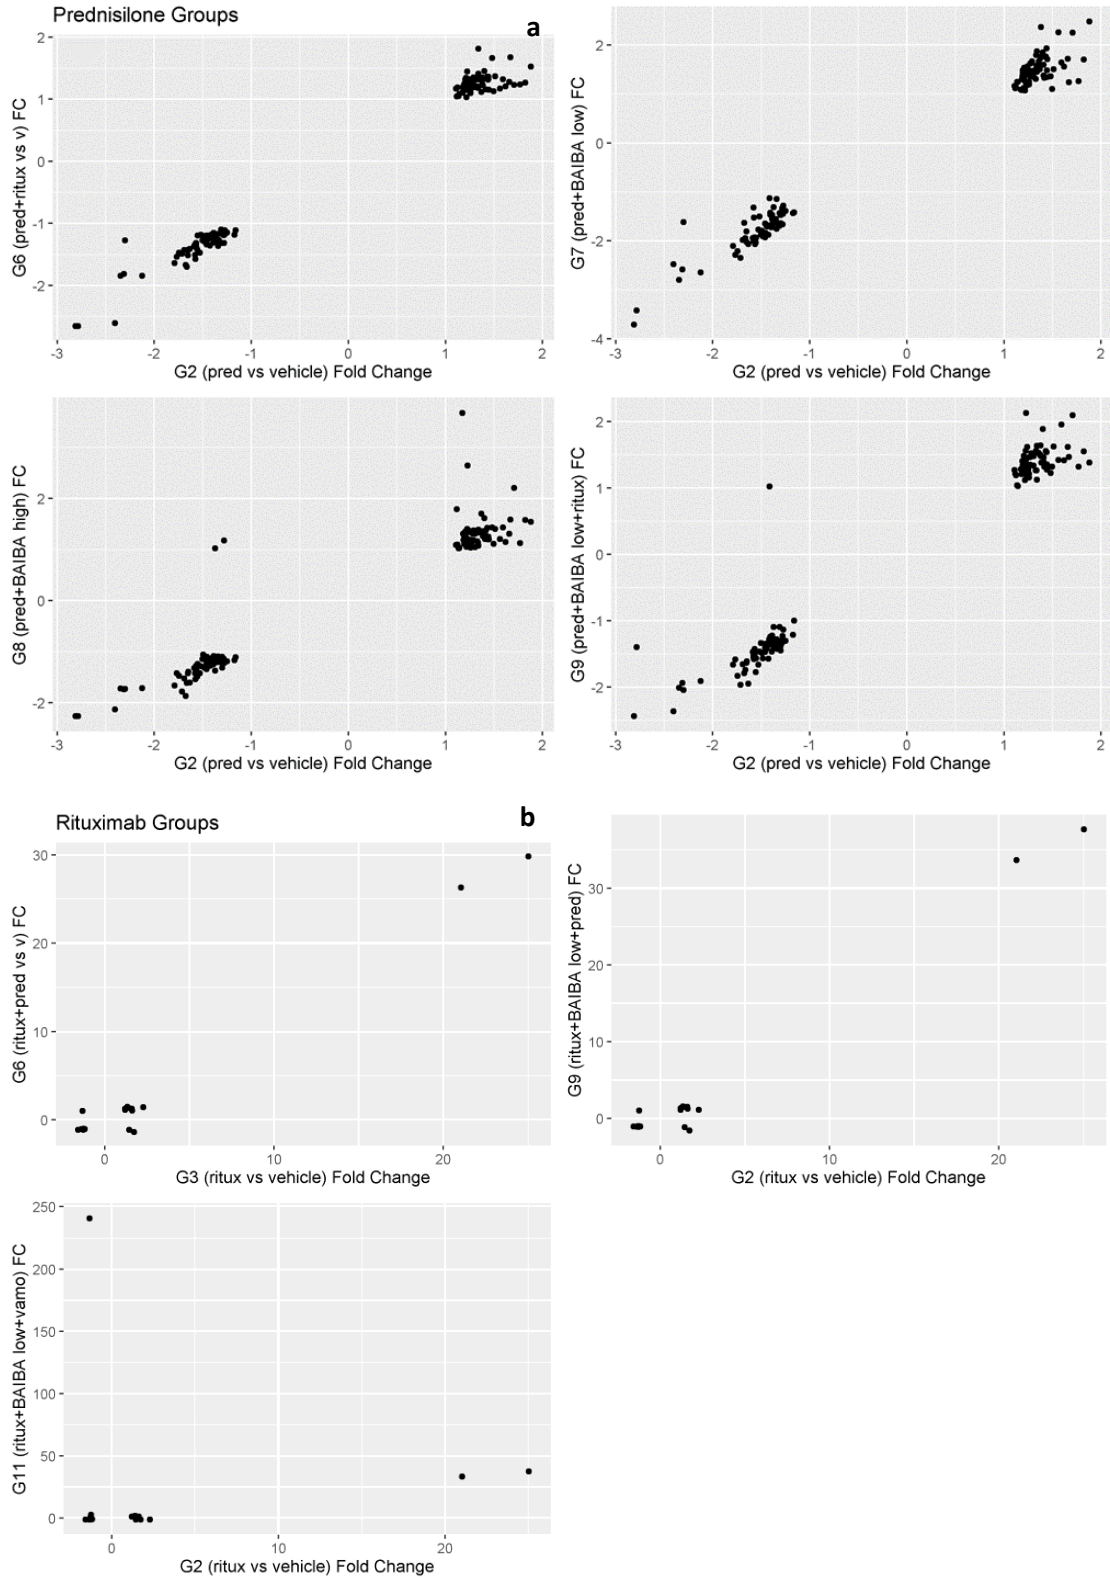

**Supplementary Figure 1: Fold Change Scatter plots of fold change values for prednisolone and rituximab from drug groups (individual vs. combination). Rituximab plots seem compressed to the lower left due to large outliers.**

# Supplementary Information for Multidrug AGADA Trial

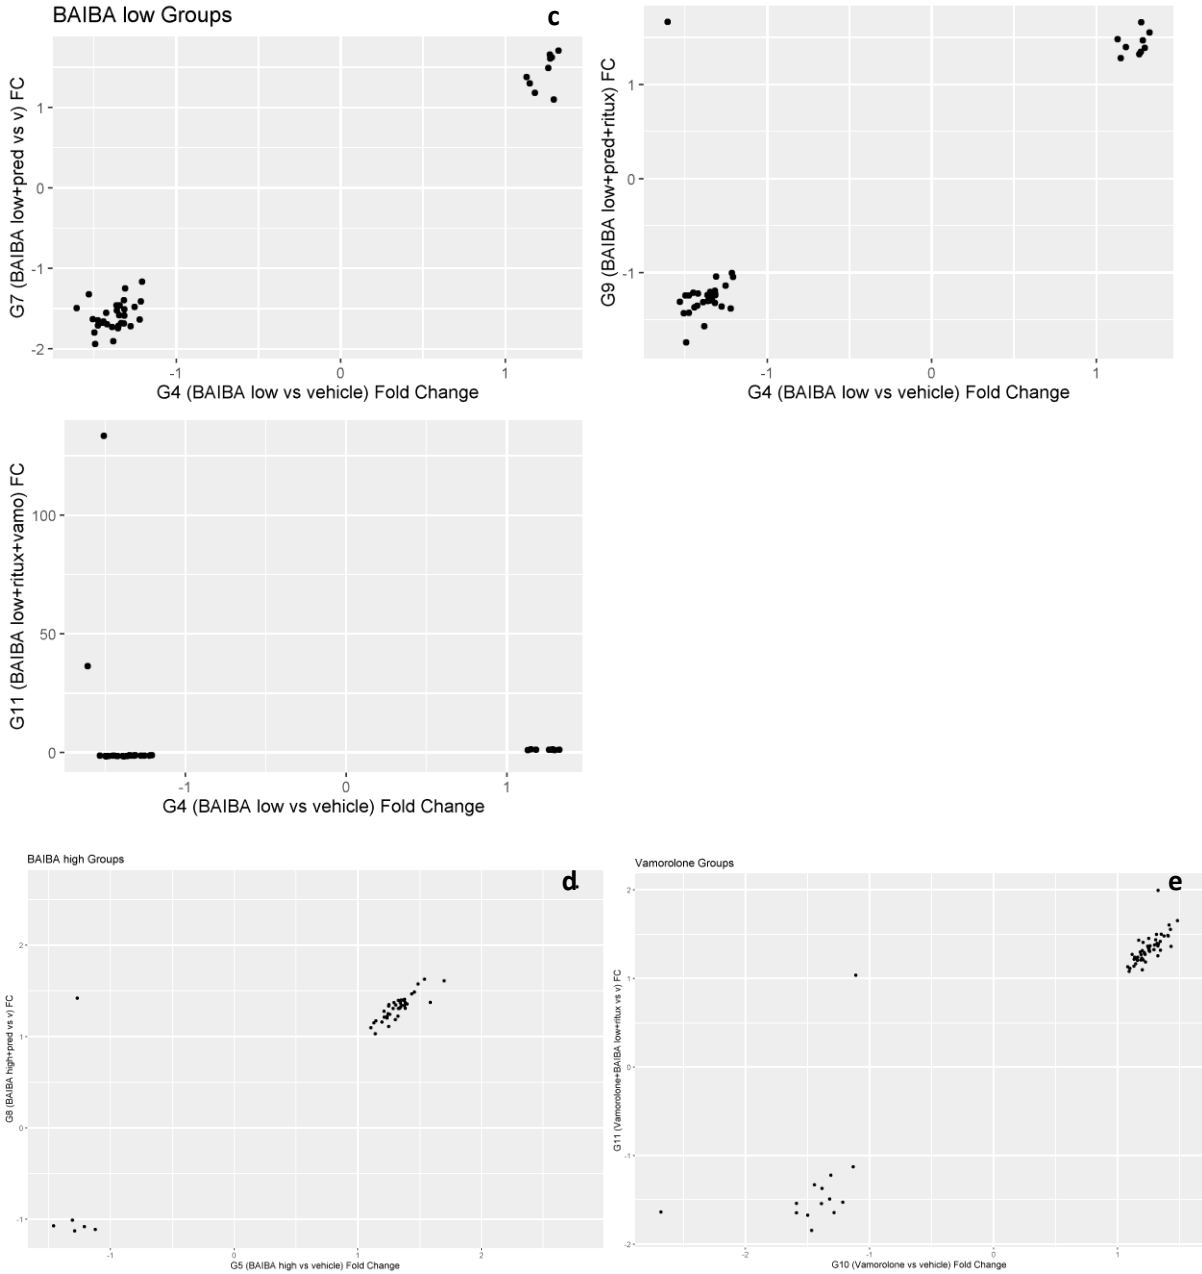

**Supplementary Figure 1 continued: Fold Change Scatter plots of fold change values for prednisolone and rituximab from drug groups (individual vs. combination). BAIBA low plots seem compressed to the lower left due to large outliers.**

# Supplementary Information for Multidrug AGADA Trial

Venn Diagram of Prednisilone Against Validation Groups

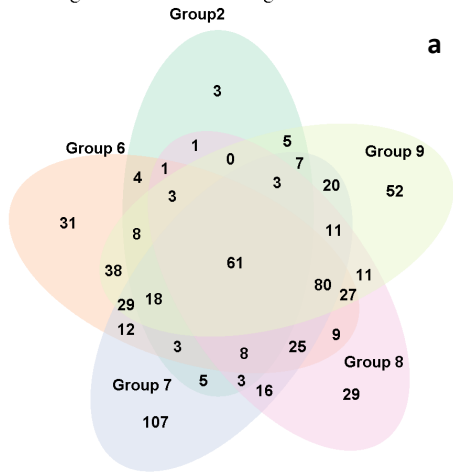

Venn Diagram of Rituximab with Validation Groups

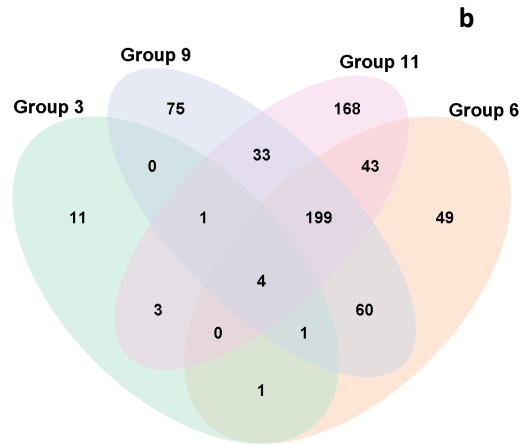

Venn Diagram of Vamorolone with Validation Group

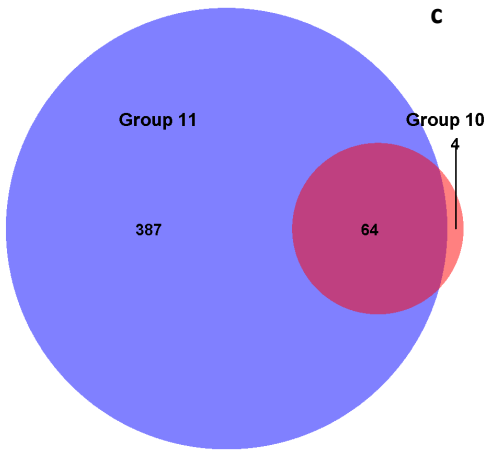

Venn Diagram of BAIBA low with Validation Groups

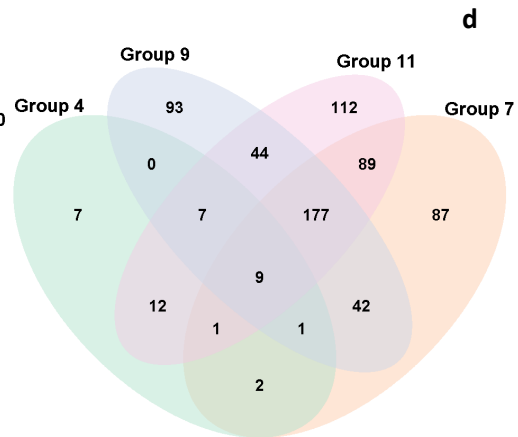

Venn Diagram of BAIBA high with Validation Groups

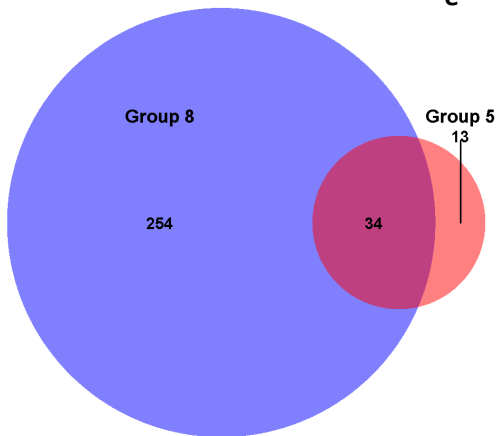

Venn Diagram of Four Main Treatment Groups

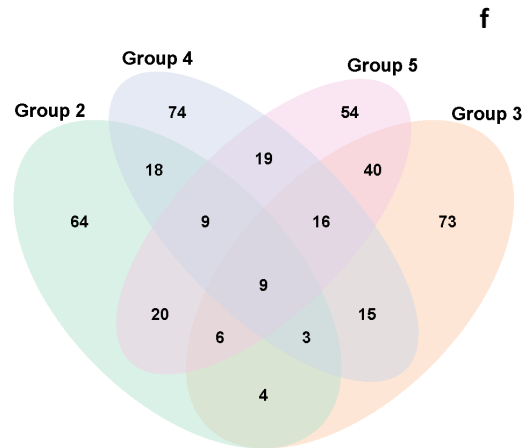

**Supplementary Figure 2: Venn diagrams for significant proteins in all treatment groups.** Intersections indicate commonality between groups. Specific protein details for diagrams in: Venn diagram supporting data pdf files.

# Supplementary Information for Multidrug AGADA Trial

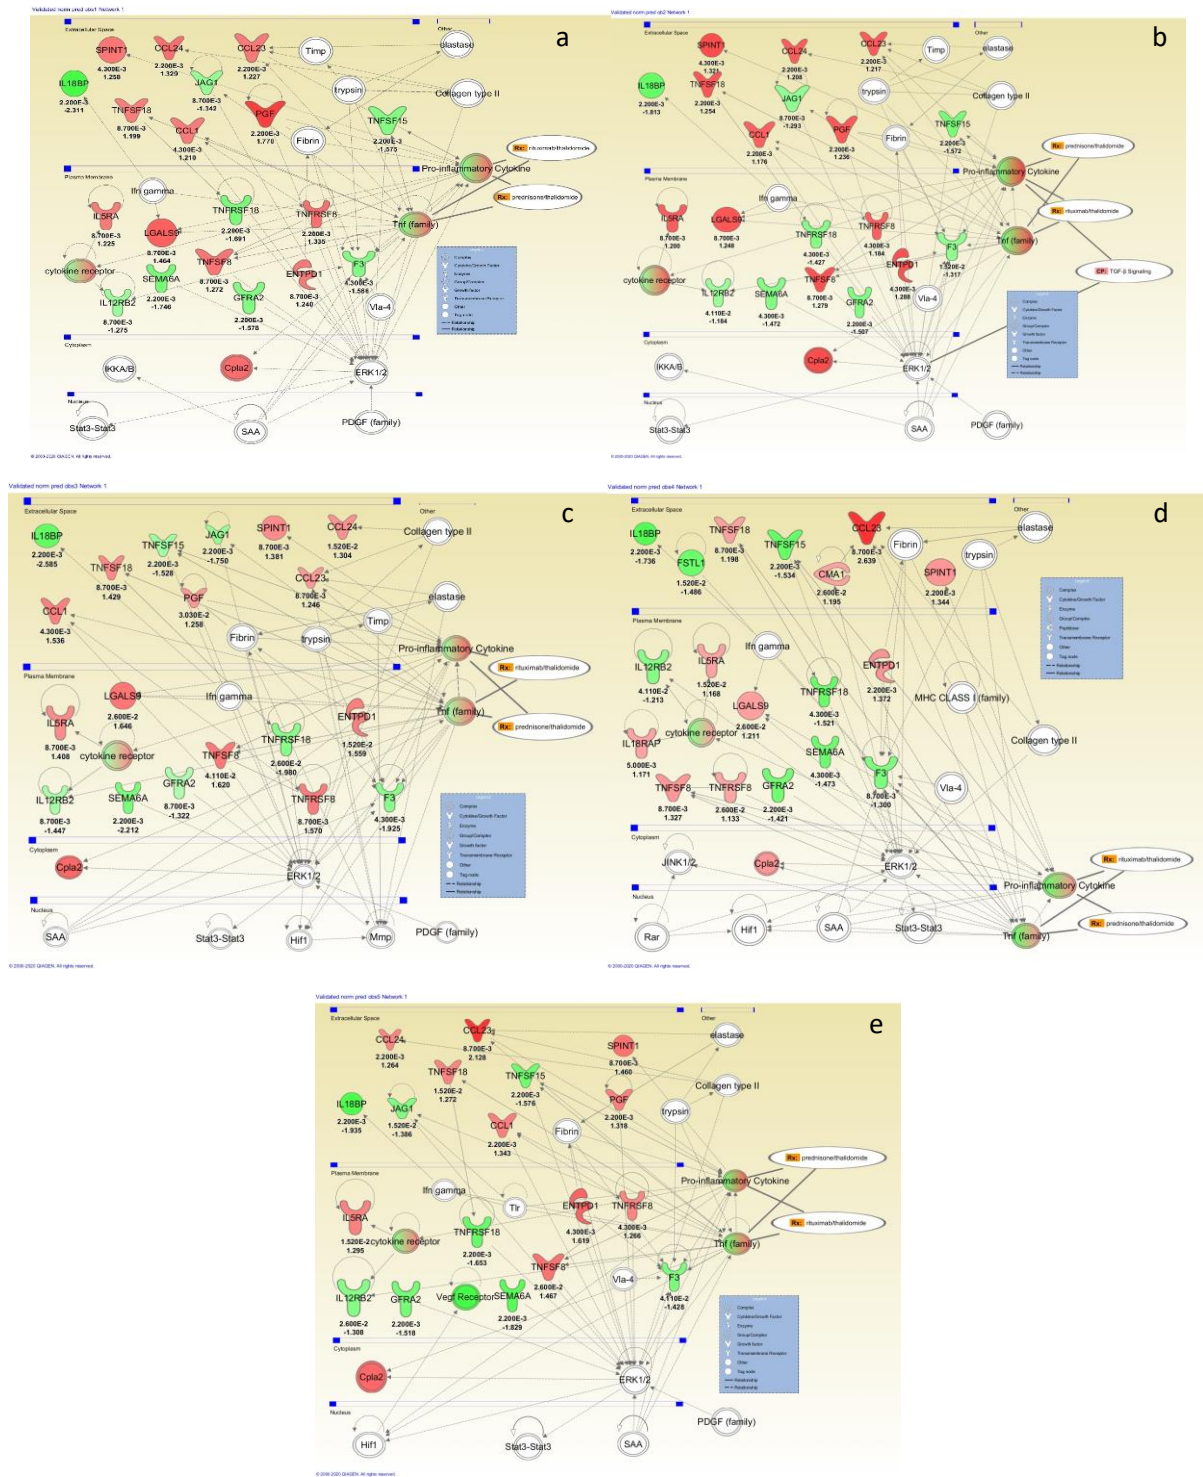

**Supplementary Figure 3: IPA Diagrams for Prednisilone.** Figures: a) Prednisilone only, b) Prednisilone and Rituximab, c) Prednisilone plus BAIBA low dose, d) Prednisilone plus BAIBA high dose, e) Prednisilone plus Rituximab plus BAIBA low dose. Red indicates upregulation and green indicates downregulation and color intensity correlates with size of expression change. The multicore elements are protein complexes where the underlying data and documentation are inconsistent with IPA's search algorithms and therefore, the details are not shown.

# Supplementary Information for Multidrug AGADA Trial

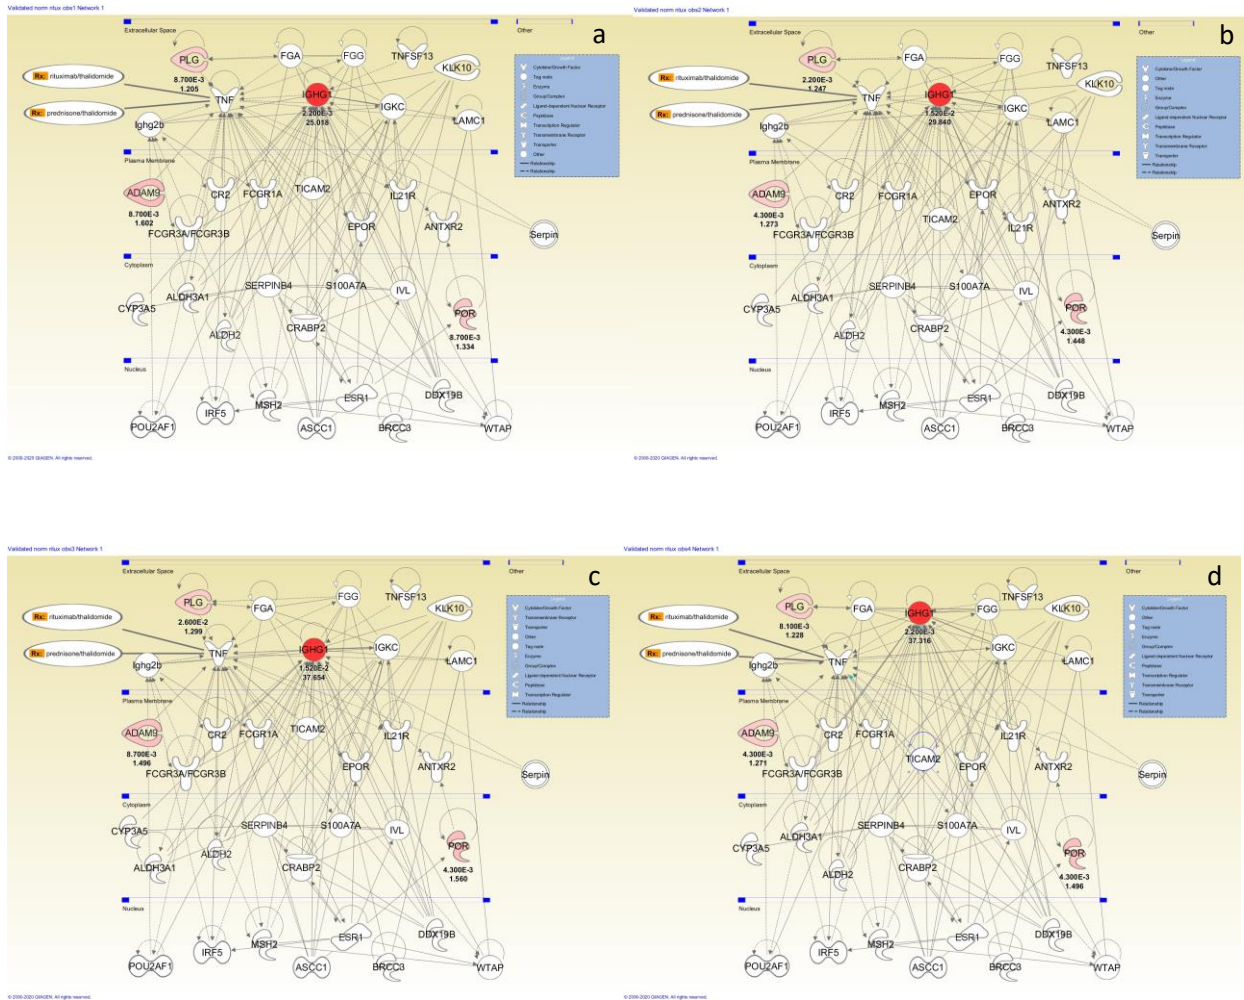

**Supplementary Figure 4: IPA Diagrams for Rituximab.** Figures: a) Rituximab b) Rituximab plus prednisolone c) Rituximab plus prednisolone plus BAIBA low dose, d) Rituximab plus vamorolone plus BAIBA low dose.

Red indicates upregulation and green indicates downregulation and color intensity correlates with size of expression change. The multicolored elements are protein complexes where the underlying data and documentation are inconsistent with IPAs search algorithms and therefore, the details are not shown.

# Supplementary Information for Multidrug AGADA Trial

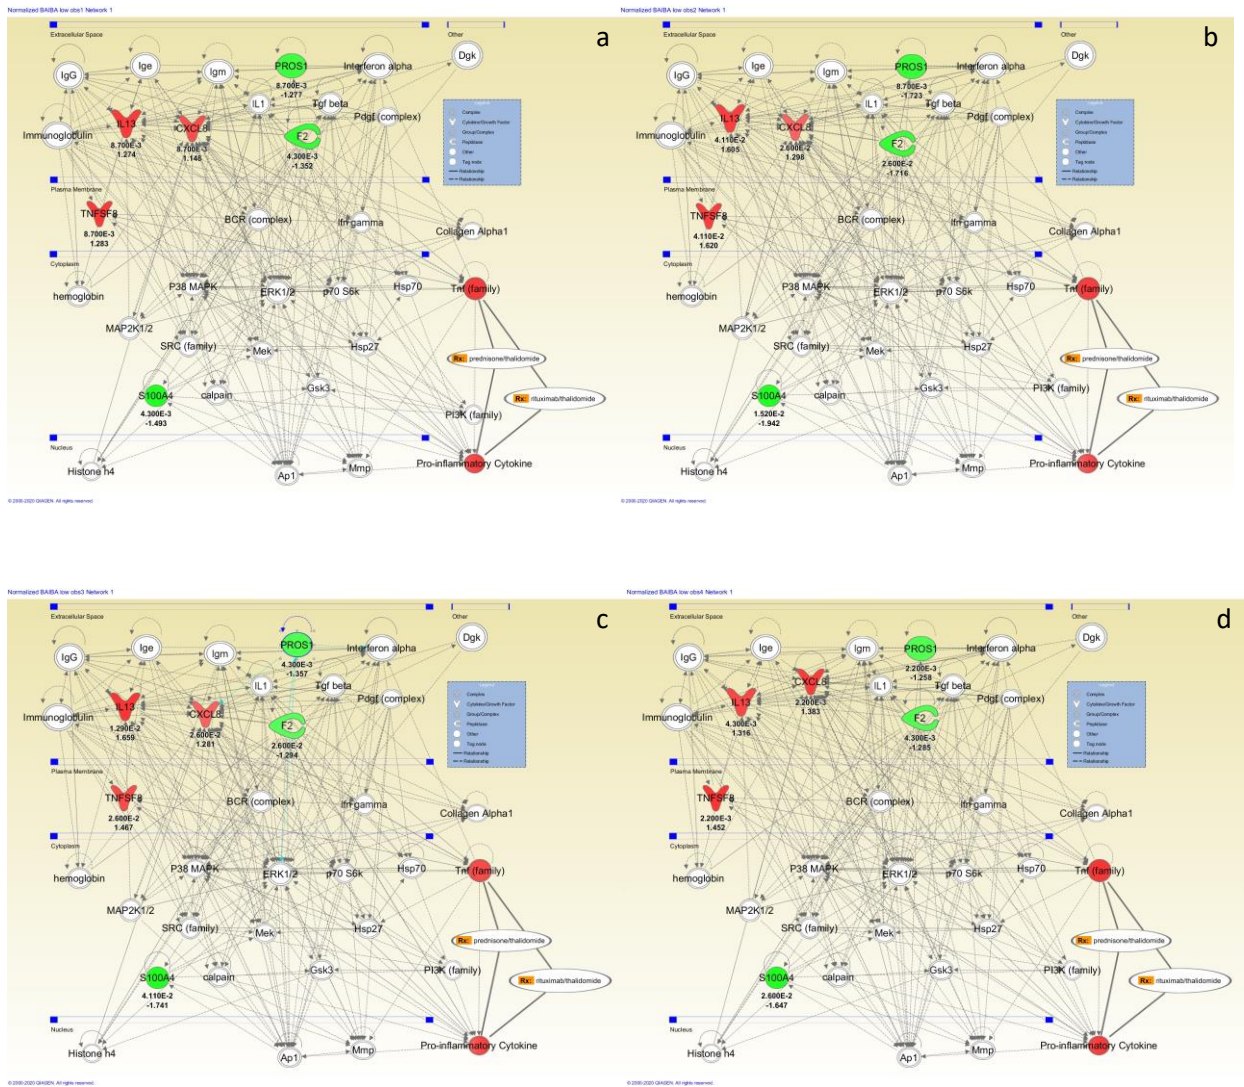

**Supplementary Figure 5: IPA Diagrams for BAIBA low dose.** Figures: a) BAIBA low dose, b) BAIBA low dose plus prednisolone, c) BAIBA low dose plus rituximab plus prednisolone, d) BAIBA low dose plus rituximab plus vamorolone.

Red indicates upregulation and green indicates downregulation and color intensity correlates with size of expression change. The multicolored elements are protein complexes where the underlying data and documentation are inconsistent with IPAs search algorithms and therefore, the details are not shown.



# Supplementary Information for Multidrug AGADA Trial

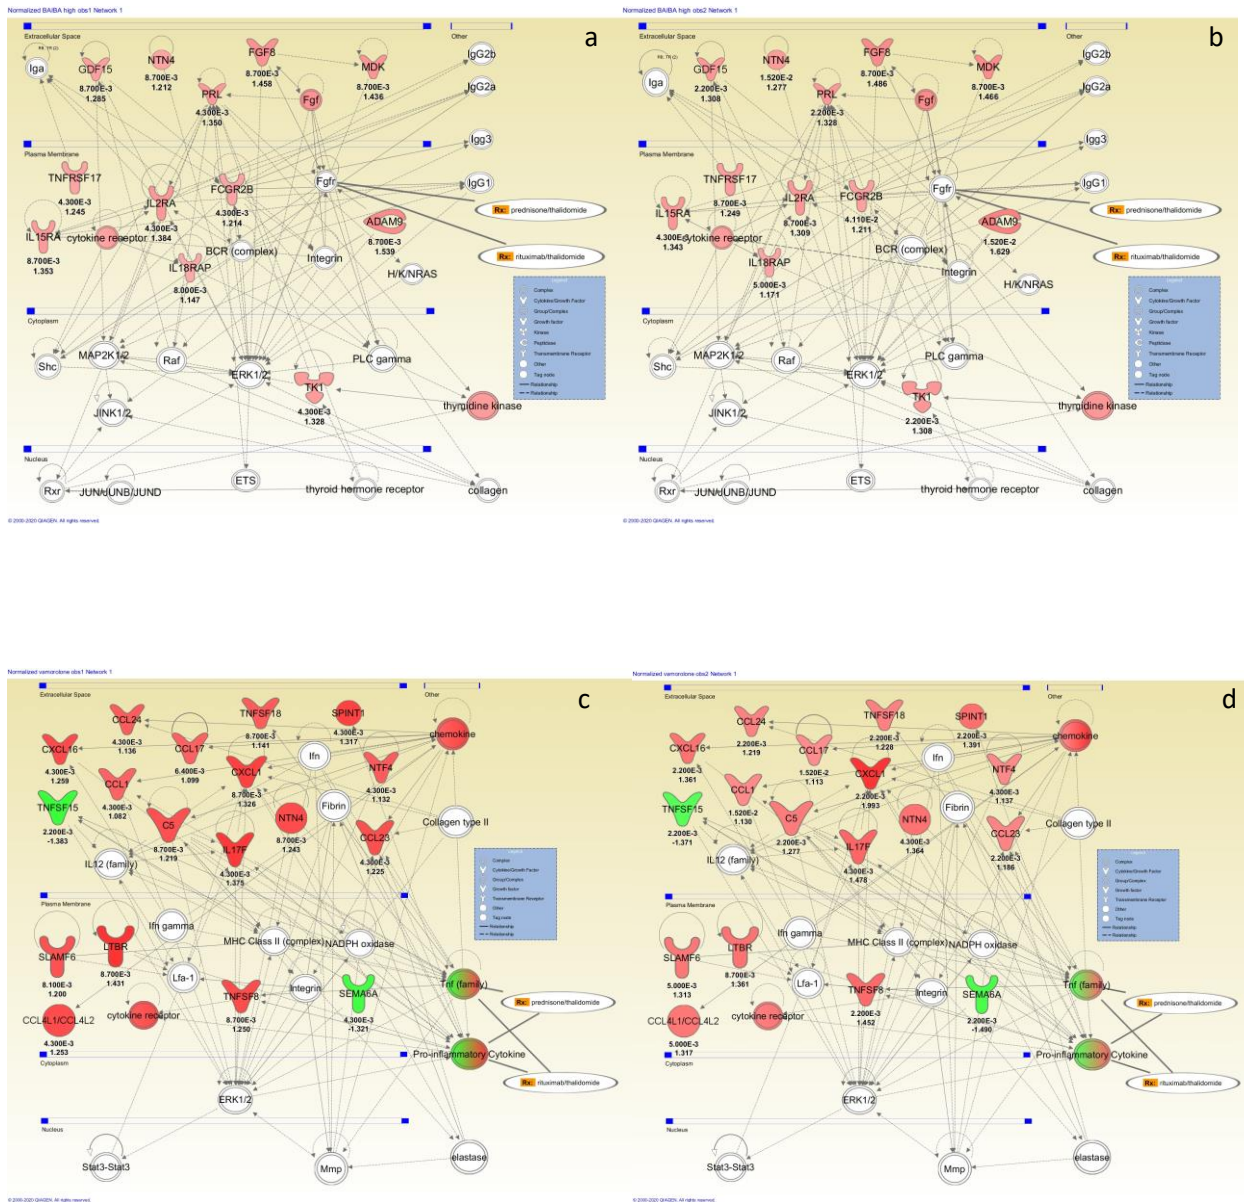

**Supplementary Figure 6: IPA Diagrams for BAIBA high dose and Vamorolone.** Figures: a) BAIBA high dose, b) BAIBA high dose plus prednisolone, c) Vamorolone, d) Vamorolone plus rituximab plus BAIBA low dose.

Red indicates upregulation and green indicates downregulation and color intensity correlates with size of expression change. The multicolored elements are protein complexes where the underlying data and documentation are inconsistent with IPAs search algorithms and therefore, the details are not shown.
